# The relativistic jet of the $\gamma$ -ray emitting narrow-line Seyfert 1 galaxy PKS J1222+0413

Daniel Kynoch,<sup>1\*</sup> Hermine Landt,<sup>1</sup> Martin J. Ward,<sup>1</sup> Chris Done,<sup>1</sup> Catherine Boisson,<sup>2</sup> Mislav Baloković,<sup>3,4</sup> Emmanouil Angelakis<sup>5</sup> and Ioannis Myserlis<sup>5</sup>

<sup>1</sup>Centre for Extragalactic Astronomy, Department of Physics, Durham University, South Road, Durham DH1 3LE, UK

<sup>2</sup>LUTH, Observatoire de Paris, CNRS, Université Paris Diderot, PSL Research University Paris, 5 place Jules Janssen, F-92195 Meudon, France

<sup>3</sup>Center for Astrophysics | Harvard & Smithsonian, 60 Garden Street, Cambridge, MA 20138, USA

<sup>4</sup>Black Hole Initiative at Harvard University, 20 Garden Street, Cambridge, MA 02138, USA

<sup>5</sup>Max-Planck-Institut für Radioastronomie, Auf dem Hügel 69, D-53121 Bonn, Germany

Accepted 2019 April 25. Received 2019 April 18; in original form 2019 February 1

## ABSTRACT

We present a multifrequency study of PKS J1222+0413 (4C +04.42), currently the highest redshift  $\gamma$ -ray emitting narrow-line Seyfert 1 ( $\gamma$ -NLS1). We assemble a broad spectral energy distribution (SED) including previously unpublished datasets: X-ray data obtained with the *NuSTAR* and *Neil Gehrels Swift* observatories; near-infrared, optical, and UV spectroscopy obtained with VLT X-shooter; and multiband radio data from the Effelsberg telescope. These new observations are supplemented by archival data from the literature. We apply physical models to the broad-band SED, parametrizing the accretion flow and jet emission to investigate the disc–jet connection. PKS J1222+0413 has a much greater black hole mass than most other NLS1s,  $M_{\text{BH}} \approx 2 \times 10^8 M_{\odot}$ , similar to those found in flat spectrum radio quasars (FSRQs). Therefore this source provides insight into how the jets of  $\gamma$ -NLS1s relate to those of FSRQs.

**Key words:** galaxies: active – galaxies: individual: PKS J1222+0413 – galaxies: jets – galaxies: Seyfert – gamma-rays: galaxies.

## 1 INTRODUCTION

The relativistic jets present in a subset of active galactic nuclei (AGN) are among the most energetic phenomena in the Universe. Matter transported in these jets is expelled from the nucleus at velocities approaching the speed of light. These jets are highly collimated and can extend for great distances beyond the galaxy in which they originate, far out into intergalactic space. The most spectacular examples of these are the jets of blazars, in which the jet is aligned to our line of sight. As a result of relativistic beaming, the emission from the jet is amplified and non-thermal emission from the jet can be detected across the whole electromagnetic spectrum from radio to  $\gamma$ -rays.

Blazar jet emission is understood to originate from highly energetic electrons within the jet. Synchrotron emission resulting from the electrons entrained in magnetic field lines in the jet produces a low-frequency peak (at radio-to-X-ray frequencies) in the spectral energy distribution (SED). A second, higher frequency, peak (at X-ray-to- $\gamma$ -ray frequencies) results from the up-scattering of soft seed photons; the peak frequency and luminosity of this feature depends on the environment in which the electrons cool. Flat spectrum radio

quasars (FSRQs) are high accretion rate systems ( $L/L_{\text{Edd}} \sim 0.1$ ) with a luminous accretion disc and broad-line region (BLR). In FSRQs, electrons within the jet cool by up-scattering seed photons originating in the accretion flow (from the disc and its corona, the BLR and extended, dusty torus) via the external Compton (EC) mechanism (e.g. Gardner & Done 2018). In contrast, the dearth of external seed photons in low accretion rate BL Lacertae objects (BL Lacs) means the electrons cool by Compton upscattering the synchrotron photons they emit, via the synchrotron self-Compton (SSC) process (e.g. Ghisellini & Tavecchio 2009; Gardner & Done 2014). BL Lacs and FSRQs form a ‘blazar sequence’ (Fossati et al. 1998; Ghisellini et al. 2017) from the low-power, high-frequency peaked SEDs of BL Lacs to high-power, low-frequency peaked SEDs of FSRQs.

Ghisellini et al. (2014) found that the jet power of FSRQs and BL Lacs is correlated with, and often exceeds, the accretion power. It has been proposed that jets are able to draw power from the angular momentum of spinning black holes (BHs; Blandford & Znajek 1977) or may be launched by a high concentration of accumulated magnetic flux (Sikora & Begelman 2013), although the launching and powering mechanisms of jets are still debated. Some early studies thought that the mass of the BH must play a role, since FSRQs and BL Lacs all have high-mass BHs ( $\log(M_{\text{BH}}/M_{\odot}) \gtrsim 8-9$ , Ghisellini et al. 2010) and are hosted in large, elliptical

\* E-mail: daniel.kynoch@durham.ac.uk

galaxies. This view changed with the *Fermi Gamma-Ray Space Telescope* detection of  $\gamma$ -ray emission from narrow-line Seyfert 1 galaxies (Abdo et al. 2009). NLS1s usually have low BH masses ( $\log(M_{\text{BH}}/M_{\odot}) = 6.9$ , high accretion rates (Rakshit et al. 2017) and are typically found in spiral galaxies. With luminous accretion discs and BLRs, the electron cooling environment of their jets (and hence the spectral properties of their non-thermal SEDs) are very similar to those of FSRQs, but at much lower jet powers. However, where (and whether)  $\gamma$ -NLS1s fit on the standard blazar sequence is still an open question. By investigating the jet and accretion flow properties of  $\gamma$ -NLS1s we can better understand how relativistic jets scale with the mass and accretion rate of the central BH.

### 1.1 The source PKS J1222+0413

PKS J1222+0413 (RA: 12 22 22.548, Dec.: +04 13 15.75) was identified as a  $\gamma$ -ray NLS1 candidate by Yao et al. (2015) and, at redshift  $z = 0.9662$ , is currently the most distant example of this class known. From its SDSS spectrum, they determined its mass to be  $M_{\text{BH}} = 1.8\text{--}2.0 \times 10^8 M_{\odot}$ . Its simultaneous and quasi-simultaneous SED was studied by Giommi et al. (2012), although at the time it was not known to be an NLS1. Like 1H 0323+342, which was studied in great detail by Kynoch et al. (2018), the accretion disc of PKS J1222+0413 is a prominent feature in its SED, unlike other  $\gamma$ -NLS1s which are more jet-dominated. PKS J1222+0413 is therefore another ideal object in which to examine the disc–jet connection. We present new data from the *Nuclear Spectroscopic Telescope Array* (*NuSTAR*), VLT X-shooter, and Effelsberg. The VLT X-shooter data allow us to investigate the NLS1 nature of the source and measure the AGN continuum emission from the accretion disc. The 0.3–10 keV X-ray band has been shown to contain contributions from both the accretion flow and jet (e.g. Kynoch et al. 2018; Larsson et al. 2018) whereas the higher energy X-rays, sampled by *NuSTAR* and *Swift* Burst Alert Telescope (BAT), are jet-dominated.

Throughout this paper, we assume a  $\Lambda$  cold dark matter cosmology with  $H_0 = 70 \text{ km s}^{-1} \text{ Mpc}^{-1}$ ,  $\Omega_m = 0.3$ , and  $\Omega_{\Lambda} = 0.7$ . Therefore the redshift  $z = 0.9662$  implies a luminosity distance of 6332.3 Mpc and a flux-to-luminosity conversion factor of  $4.80 \times 10^{57} \text{ cm}^2$ . Length scales are often quoted in gravitational radii,  $R_g = GM_{\text{BH}}/c^2 = 2.95 \times 10^{11} \text{ m} = 1.14 \times 10^{-2} \text{ light-days}$  for our derived mass.

## 2 X-SHOOTER SPECTROSCOPY

### 2.1 The observations and data reduction

We have conducted X-shooter (Vernet et al. 2011) observations of five  $\gamma$ -NLS1s (including PKS J1222+0413) in the Southern and equatorial sky, with the aim of characterizing their accretion disc continuum and emission line properties. Our near-infrared, optical, and ultraviolet spectra were obtained using X-shooter which is a wide-band, intermediate resolution spectrograph developed for the Very Large Telescope (VLT). The instrument is mounted on the VLT’s 8.2 m Unit Telescope 2 at ESO Paranal in Chile. Dichroics in the instrument reflect light into ultraviolet-blue (UVB) and visible light (VIS) arms and transmit the remaining light to the near-infrared (NIR) arm. At the end of each arm is an échelle spectrograph, with the UVB spectrograph covering the 300–550 nm range, the VIS spectrograph covering 550–1010 nm and the NIR spectrograph covering 1000–2500 nm. Thus, by operating these three spectrographs simultaneously, X-shooter offers a very wide

wavelength coverage from 300 to 2500 nm. We used the 0.9 arcsec  $\times$  11 arcsec, 1.2 arcsec  $\times$  11 arcsec, 1.3 arcsec  $\times$  11 arcsec slits, giving spectral resolutions  $R \approx 5600$ , 6700, and 4000 in the IR, optical, and UV spectra, respectively. The observation was conducted on 2017 April 3 under favourable weather conditions with clear skies and seeing  $\approx 1$  arcsec at 500 nm. The on-source integration time was 1 h and the mean S/N achieved in the IR, optical, and UV spectra were 12, 16, and 23, respectively.

The data reduction was performed with the ESO REFLEX software which outputs wavelength- and flux-calibrated 1D spectra. Corrections for telluric absorption in the optical and UV spectra were performed with the XTELLCOR.GENERAL tool available as part of the SPEXTOOL IDL package (Vacca, Cushing & Rayner 2003; Cushing, Vacca & Rayner 2004).

To sample the AGN continuum emission within the X-shooter spectral range, we averaged the flux in several emission line free windows of width 50 Å. These were (rest frame): 1660, 2000, and 2200 Å observed in the UV; 3050, 3930, and 4205 Å observed in the optical; 5100, 6205, 8600, and 11020 Å observed in the IR. Five of these windows are those suggested by Capellupo et al. (2015) for the purpose of modelling accretion disc emission in SEDs.

### 2.2 Estimates of the black hole mass

We estimate the BH mass of PKS J1222+0413 using virial scaling relations employing the full widths at half-maximum (FWHMs) of the broad components of permitted emission lines (namely H $\alpha$ , H $\beta$ , and Mg II) and the ionizing continuum luminosities measured at 5100 and 3000 Å in the rest frame. All of these quantities are covered simultaneously by our X-shooter spectrum (Fig. 1). The measurements of the 5100 and 3000 Å continuum luminosities are straightforward and we get values of  $\log \nu L_{5100\text{Å}} = 45.56 \text{ erg s}^{-1}$  and  $\log \nu L_{3000\text{Å}} = 45.66 \text{ erg s}^{-1}$ , respectively.

Before measuring the emission line widths and fluxes we first modelled and subtracted Fe II emission complexes around H  $\beta$  and Mg II following the method described in Landt et al. (2017). The Mg II  $\lambda 2008$  emission line is a blended doublet of lines centred at 2795 and 2802 Å with an intensity ratio of approximately 1.2:1. To determine the widths of the individual broad lines we model the doublet as the sum of two broad Lorentzians with their intensities and wavelength separation fixed to the theoretical values. Additionally, we include two narrow Gaussian lines to account for any contribution from the narrow emission line region. The narrow lines are fixed to the same intensity ratio and separation, and their widths are limited to be in the range  $300 \text{ km s}^{-1} \leq \text{FWHM} \leq 900 \text{ km s}^{-1}$ . The fitting is performed with a custom PYTHON script employing the LMFIT package, which uses the Levenberg–Marquardt method of least-squares fitting. We find that the inclusion of the narrow lines does not improve the fit, therefore we model the doublet simply as the sum of two Lorentzians (see Fig. 2). The FWHM of these lines is  $\approx 1750 \text{ km s}^{-1}$ . Using the recently recalibrated BH mass relationship of Mejía-Restrepo et al. (2016),<sup>1</sup> we estimate the BH mass to be  $(2.6_{-1.2}^{+2.0}) \times 10^8 M_{\odot}$ .

In order to correctly measure the widths of the Balmer emission line broad components, we need to subtract any contribution from the narrow-line region. Commonly, the [O III]  $\lambda 5007$  forbidden emission line is taken as being representative of the narrow emission line profiles. A narrow line with the same profile as

<sup>1</sup>Specifically, we use the calibration for the local continuum fit corrected for small systematic offsets (see their table 7).

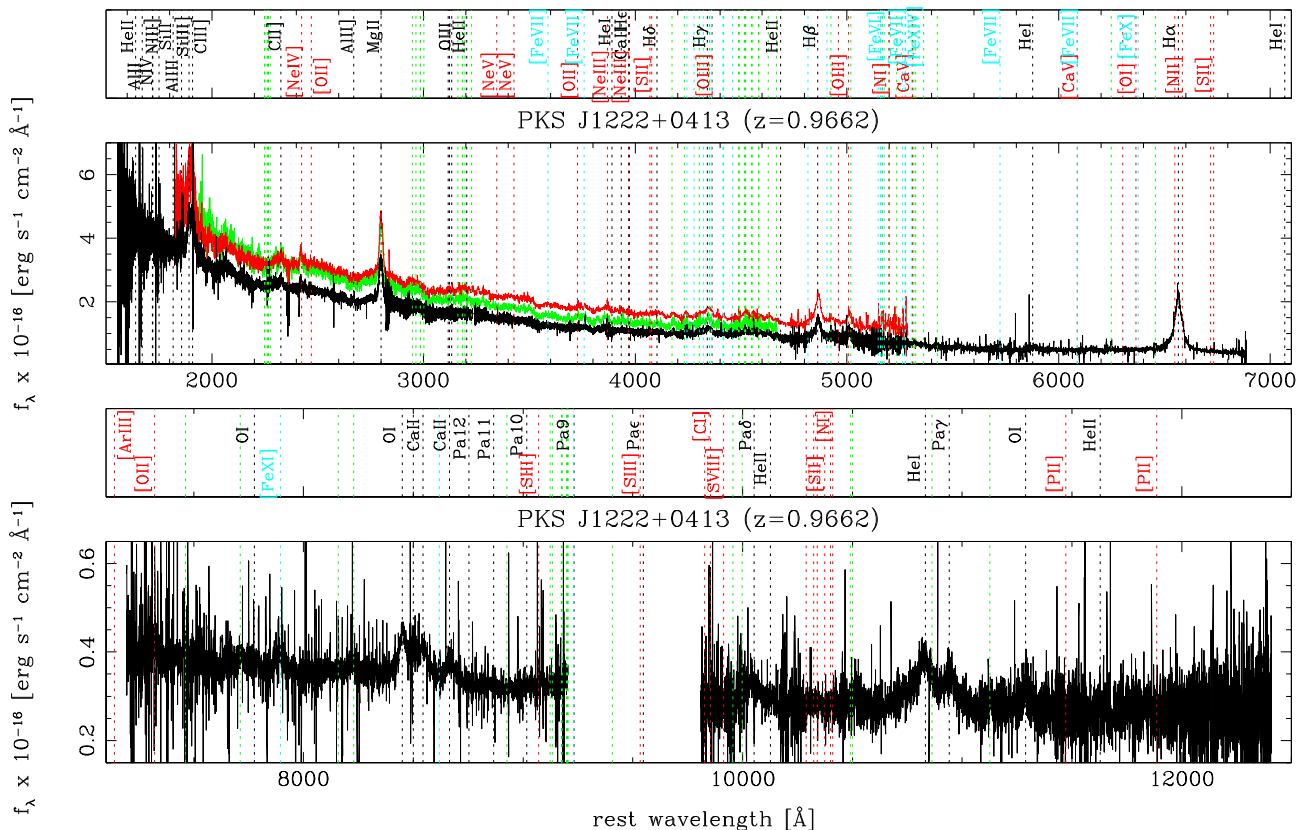

**Figure 1.** VLT X-shooter spectra (black) taken 2017 April 3. SDSS spectra taken 2008 February 13 and 2011 March 26 are overplotted in green and red, respectively.

[O III]  $\lambda$ 5007 is then subtracted from the (total) permitted line profiles, in principle leaving only their broad components. However, the [O III]  $\lambda$ 5007 line is very weak in this source so its profile is unsuitable for this purpose. Instead, we measure its total flux and use this to estimate the likely scaled flux of narrow H $\beta$  in the following way. ‘Normal’ Seyferts have a typical [O III]  $\lambda$ 5007 to narrow H $\beta$  flux ratio of  $\approx 10$  (e.g. Cohen 1983) and analyses of large samples have found consistent narrow-line ratios in NLS1s (e.g. Véron-Cetty, Véron & Gonçalves 2001; Zhou et al. 2006; Rakshit et al. 2017). We estimate the [O III]  $\lambda$ 5007 line luminosity by integrating the observed flux density and we determine  $\log L_{[\text{O III}] \lambda 5007} = 42.3 \text{ erg s}^{-1}$ . Assuming the ratio  $L_{[\text{O III}] \lambda 5007} / L_{\text{H}\beta}^n = 10$  for our source,  $\log L_{\text{H}\beta}^n = 41.3 \text{ erg s}^{-1}$ , which is negligible compared to the total line luminosity  $\log L_{\text{H}\beta} = 43.11 \text{ erg s}^{-1}$ . Clearly, if the contribution from the narrow-line component is negligible then we can measure the FWHM of H $\beta$  directly from its observed profile and we obtain  $\text{FWHM}(\text{H}\beta) \approx 1760 \text{ km s}^{-1}$ , which is extremely close to the FWHMs of the blended components of the Mg II doublet. Using the Bentz et al. (2013) radius–luminosity relationship for the H $\beta$  line,<sup>2</sup> derived from optical reverberation mapping results, we determine a BLR radius of  $260^{+91}_{-67}$  light-days. Then, assuming a geometrical scaling factor of  $f = 1.4$  appropriate for FWHM measures (Onken et al. 2004), we derive a BH mass of  $(2.2^{+0.8}_{-0.5}) \times 10^8 M_{\odot}$ . We measure an  $\text{FWHM} = 1850 \text{ km s}^{-1}$  for H $\alpha$ . Using the BH mass relationship of Mejía-Restrepo et al. (2016)

we estimate the BH mass to be  $(2.5^{+1.1}_{-0.8}) \times 10^8 M_{\odot}$ . These mass estimates and the relations used to calculate them are tabulated in Table 1.

Our estimates of the BH mass based on the ionizing continuum luminosity and the width of the broad Balmer emission lines H $\alpha$  and H $\beta$  and the Mg II emission line give a very small range of values of  $\approx 2.2\text{--}2.6 \times 10^8 M_{\odot}$ , with an average value of  $\approx 2.4 \times 10^8 M_{\odot}$ . This excellent agreement between the three estimates is remarkable, given that the relationships upon which they are based have uncertainties of the order of  $\sim 30\text{--}80$  per cent at the  $1\sigma$  level.

Alternative methods to estimate the BH mass, which are based on the line luminosity instead of the ionizing continuum luminosity (e.g. Greene et al. 2010; Mejía-Restrepo et al. 2016) are also considered and we quote the results in Table 1. These estimates are in the range of  $\sim 0.5\text{--}0.8 \times 10^8 M_{\odot}$ , which are a factor of  $\sim 4$  smaller than found previously. Since we use the same broad-line FWHMs in both estimates, the difference in the estimated masses is due to the different choice of proxy for the ionizing luminosity (i.e. the monochromatic continuum luminosity or the broad-line luminosity). We argue that it is unlikely that the difference in masses is due to an overestimation of the 3000 and 5100  $\text{\AA}$  luminosities because of unsubtracted emission from the host galaxy or the jet. First, for a bright AGN such as this, we expect the host galaxy emission to be relatively weak, as was previously noted by Yao et al. (2015). Certainly at 3000  $\text{\AA}$  in the rest frame the host galaxy emission will be negligible. Secondly, estimates of the mass depend approximately on the square root of the (continuum or

<sup>2</sup>Specifically, their ‘Clean2+ExtCorr’ calibration.

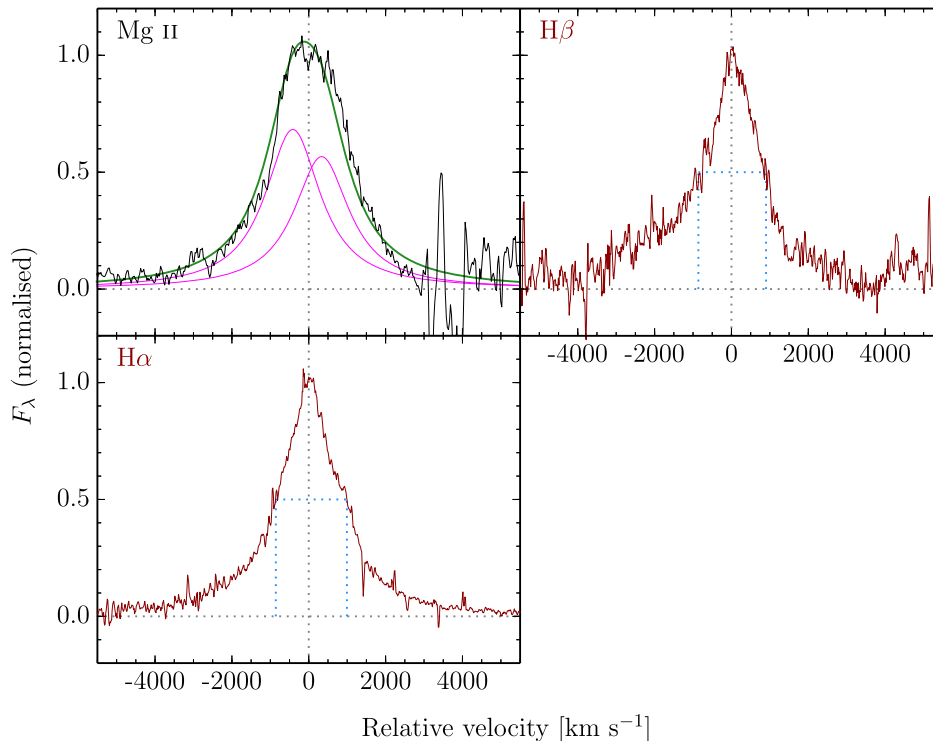

**Figure 2.** The profiles of the three broad emission lines H  $\alpha$ , H  $\beta$ , and Mg II that we used to estimate the BH mass for PKS J1222+0413. The profiles are shown in velocity space relative to the expected rest-frame wavelength and have been Fe II- and continuum-subtracted and normalized to the same peak intensity. In the top left panel, the Mg II profile has been modelled as the sum of two Lorentzians (magenta) and the total modelled profile is shown in green. Since the narrow-line region likely makes a negligible contribution to the Balmer line fluxes, the FWHM of the broad H  $\beta$  and H  $\alpha$  lines may be estimated directly from the observed line profiles, as shown.

line) luminosity. The two mass estimation methods would agree only if we have overestimated the AGN contribution to  $L_{5100\text{\AA}}$  and  $L_{3000\text{\AA}}$  by a factor  $\sim 4^2$ , which is highly unlikely. If we were to believe that  $L_{5100\text{\AA}}$  and  $L_{3000\text{\AA}}$  are contaminated then since the mass estimates using both luminosities are similarly high, they must contain an approximately equal fraction of contaminating emission (i.e. the contaminating non-accretion disc emission must have a spectral shape similar to that of an accretion disc); again this seems contrived. Our SED models in the following sections also demonstrate the accretion disc emission dominates at 5100 and 3000  $\text{\AA}$  (see Figs 9 and 10). We have compared the two methods of BLR radius and BH mass estimations using large samples of AGN. We find that values derived using the line luminosities are systematically smaller than those using the continuum luminosities. However, a thorough investigation of this effect is beyond the scope of this paper.

The BH mass was previously estimated by Yao et al. (2015). These authors used the width of the H  $\beta$  broad component (modelled with a broad Lorentzian profile) and the 5100  $\text{\AA}$  continuum luminosity and obtained a value of  $\approx 2 \times 10^8 M_{\odot}$ , which is consistent with our estimates using the emission line FWHMs and continuum luminosities. We adopt the mass  $2 \times 10^8 M_{\odot}$  in the following.

### 3 THE MULTIWAVELENGTH DATA SET

In this section we introduce the new and archival data with which we have assembled the multiwavelength SED of our source (Fig. 3).

#### 3.1 Data quasi-simultaneous with X-shooter

##### 3.1.1 NuSTAR

We obtained an X-ray observation of PKS J1222+0413 with *NuSTAR* (Harrison et al. 2013) on 2017 June 27–18 (OBS ID: 60301018002). The data reduction was performed following the method described in Landt et al. (2017) (see section 2.3.1 in that paper) and employing the latest software available (NUSTARDAS version 1.7.1, HEASOFT version 6.21 and CALDB version 20170222). The sum of good-time intervals after event cleaning and filtering the event files is 24.5 ks for both FPMA and FPMB. The signal-to-noise ratio is 25.5 and 15.5 per module for the 3–10, and 10–79 keV bands, respectively. The point spread function (PSF)-corrected source count rate was stable around  $0.10 \text{ s}^{-1}$  per module throughout the observation.

We analysed the *NuSTAR* spectra using XSPEC (Arnaud 1996). FPMA and FPMB spectra were fitted simultaneously, without co-adding, with a cross-normalization factor allowed to vary during the fit. Galactic absorption was assumed to be fixed at  $1.64 \times 10^{20} \text{ cm}^{-2}$ , according to Kalberla et al. (2005). A simple power-law model already fits the data very well, with  $\chi^2 = 91.3$  for 89 degrees of freedom (d.o.f.). The best-fitting photon index is  $1.33 \pm 0.06$ , where the uncertainty is given as the 68 percent confidence interval. Replacing the power-law continuum with a more flexible log-parabolic model [ $F(E) \propto E^{-\alpha - \beta \log E}$ ], we find that the curvature parameter ( $\beta$ ) is consistent with zero within uncertainties. Fluxes in the 3–10 and 10–79 keV bands

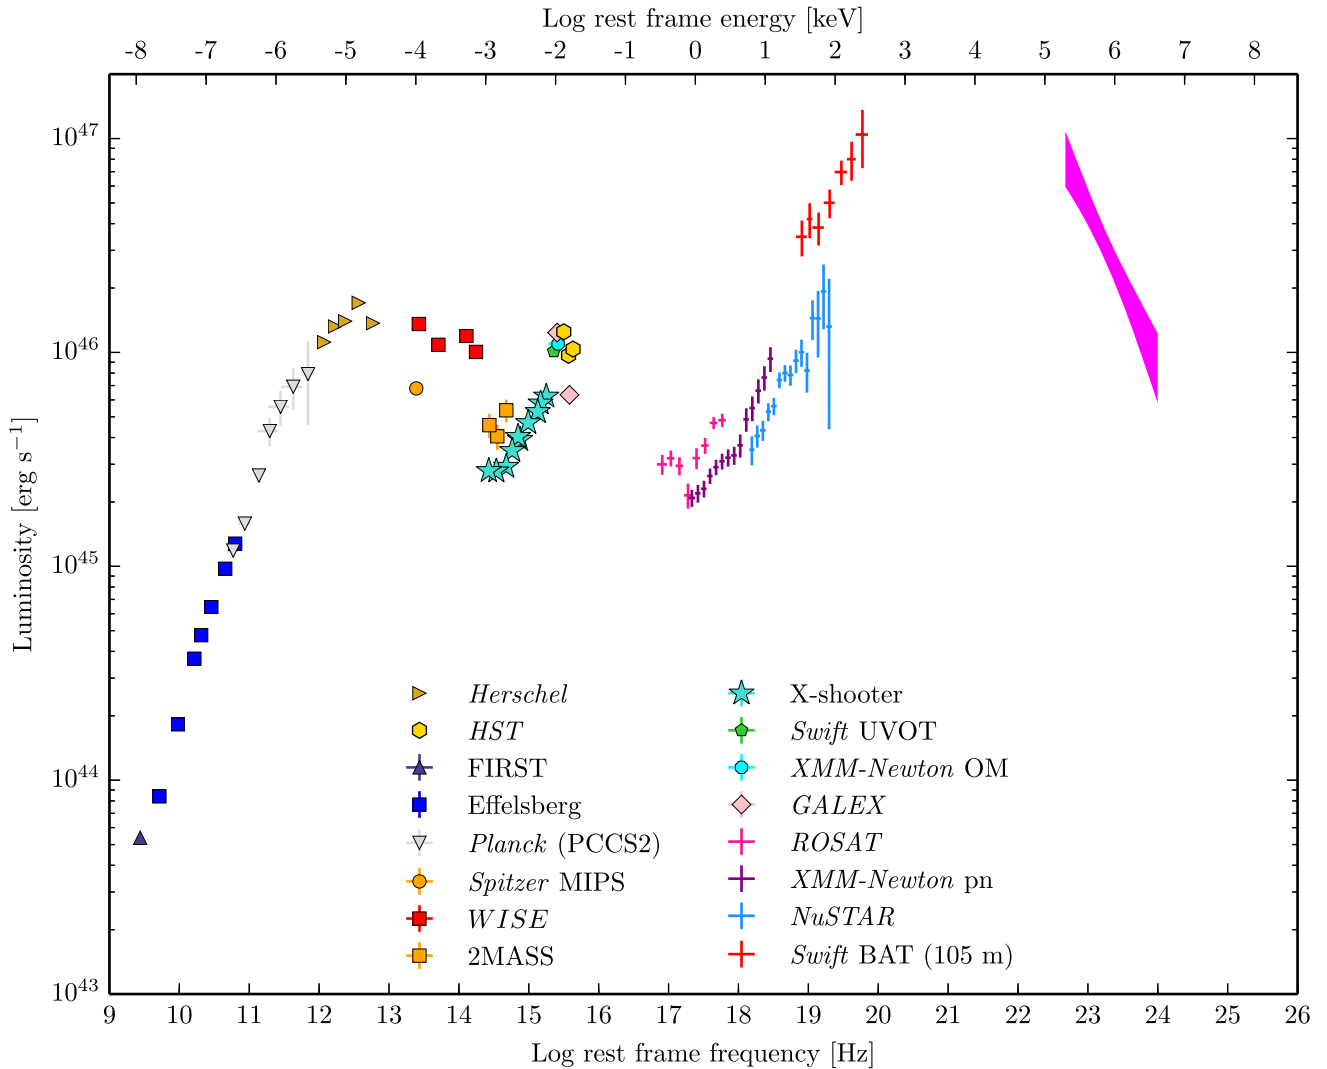

**Figure 3.** The multiwavelength SED of PKS J1222+0413. Our new data from Effelsberg (recorded between 2011 May and 2012 February), VLT X-shooter (recorded on 2017 April 3), and *NuSTAR* and *Swift* (recorded on 2017 June 27) are shown with a *Fermi*  $\gamma$ -ray spectrum covering the same period as our new NIR/optical/UV/X-ray data (2017 March–July). We also show archival data from other facilities.

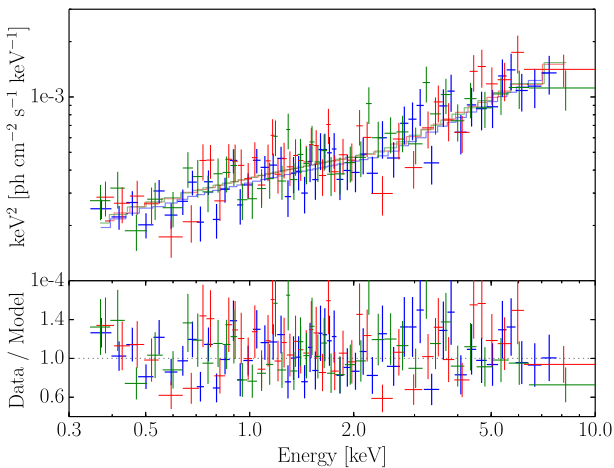

**Figure 4.** *XMM-Newton* EPIC X-ray spectra modelled with a broken power law. Data from the pn, MOS1, and MOS2 detectors are shown in blue, red, and green, respectively. The upper panel shows the data model with the detector responses folded out; the lower panel the data/model ratios.

are  $1.26 \pm 0.05 \times 10^{-12}$  and  $6.8 \pm 0.5 \times 10^{-12}$   $\text{erg s}^{-1} \text{cm}^{-2}$ , respectively.<sup>3</sup>

### 3.1.2 Swift

A 2 ks *Swift* snapshot was taken simultaneously with the *NuSTAR* observation. Data products from the X-ray telescope (XRT) were created using the XRTPIPELINE v0.13.2. The source extraction region was a 47 arcsec radius circle centred on the source (corresponding to the 90 percent encircled energy radius at 1.5 keV) and the background region was a 141 arcsec radius circular region offset from the source, in an area free of field sources. The spectra were extracted using XSELECT and ancillary response files were created with XRTMKARF. The source count rate was  $0.003 \text{ counts s}^{-1}$ .

The snapshot included a UV observation with the 2600 Å UVW1 filter. Circular source and background regions of 5 and 30 arcsec

<sup>3</sup>For comparison with previous observations, the 2–10 keV flux is  $1.53 \pm 0.06 \times 10^{-12}$   $\text{erg s}^{-1} \text{cm}^{-2}$ .

**Table 1.** Estimates of the BH mass.

| Measurements                                                                                      | $M_{\text{BH}}$<br>( $10^8 M_{\odot}$ ) | Reference                               |
|---------------------------------------------------------------------------------------------------|-----------------------------------------|-----------------------------------------|
| $\log \nu L_{3000\text{\AA}} = 45.66 \text{ erg s}^{-1}$<br>FWHM(Mg II) = 1750 km s $^{-1}$       | $2.6^{+2.0}_{-1.2}$                     | Table 7 of Mejía-Restrepo et al. (2016) |
| $\log \nu L_{5100\text{\AA}} = 45.56 \text{ erg s}^{-1}$<br>FWHM(H $\alpha$ ) = 1850 km s $^{-1}$ | $2.5^{+1.1}_{-0.8}$                     | Table 7 of Mejía-Restrepo et al. (2016) |
| $\log \nu L_{5100\text{\AA}} = 45.56 \text{ erg s}^{-1}$<br>FWHM(H $\beta$ ) = 1760 km s $^{-1}$  | $2.2^{+0.8}_{-0.5}$                     | Table 14 of Bentz et al. (2013)         |
| $\log L_{\text{H}\alpha} = 43.65 \text{ erg s}^{-1}$<br>FWHM(H $\alpha$ ) = 1850 km s $^{-1}$     | $0.5^{+0.3}_{-0.2}$                     | Table 7 of Mejía-Restrepo et al. (2016) |
| $\log L_{\text{H}\beta} = 43.11 \text{ erg s}^{-1}$<br>FWHM(H $\beta$ ) = 1760 km s $^{-1}$       | $0.8^{+0.5}_{-0.3}$                     | Table 2 of Greene et al. (2010)         |

Note: The  $1\sigma$  error is derived from the intrinsic scatter rather than the errors on the best-fitting parameter values.

radius, respectively, were analysed. Inspecting the data with the UVOTSOURCE tool, the Vega magnitude was determined to be  $16.76 \pm 0.04$  mag. The tool UVOT2PHA was used to create XSPEC-ready files.

### 3.1.3 XMM–Newton

A short observation (12 ks) of PKS J1222+0413 was made by XMM–Newton on 2006 July 12. The observation data files (OBS ID: 0401790601) were obtained from the XMM–Newton Science Archive and reduced using the Science Analysis System (SAS, v16.0.0). The observation was strongly affected by background flaring, so after filtering the EPIC event files the good exposure times were 1.8, 3.8, and 3.6 ks for the pn, MOS1, and MOS2 detectors, respectively. Circular regions of radius 40 and 120 arcsec were used to extract the source and background spectra, respectively. The source extraction regions were centred on the source whereas the background extraction regions were placed on a blank patch of sky on the same chip as the source.

The XMM–Newton optical monitor (OM) observed PKS J1222+0413 using only the UVM2 filter. The photometry for this filter was extracted using the SAS OMICHAIN and OMSOURCE tasks and standard procedures.

Data analysis was performed with the X-ray spectral fitting package XSPEC v12.9.0n (Arnaud 1996). We fitted all three EPIC (pn, MOS1, and MOS2) spectra simultaneously, allowing for a cross-normalization factor between them; these did not vary by more than  $\approx 6$  per cent. In all models we include a photoelectric absorption model (PHABS) with the Galactic neutral hydrogen absorbing column set to the value  $N_{\text{H}} = 1.66 \times 10^{20} \text{ cm}^{-2}$  reported by Dickey & Lockman (1990) and adopting the elemental abundances of Wilms, Allen & McCray (2000). The inclusion of an intrinsic absorber (ZPHABS) at the redshift of the source did not improve any of the fits. A broken power-law model is a statistically significant improvement over a single power law, with an  $F$ -test probability greater than 99.99 per cent. A more physical model including two Comptonization regions, COMPTT (Titarchuk 1994) plus NTHCOMP (Życki, Done & Smith 1999) was no improvement over the simpler broken power law. For the broken power-law model we determine an intrinsic flux of  $(3.4 \pm 0.1) \times 10^{-12} \text{ erg s}^{-1} \text{ cm}^{-2}$ . The model parameters and fit results are summarized in Table 2 and the modelled spectra are shown in Fig. 4.

**Table 2.** Results of XMM–Newton X-ray spectral fits.

| Model    | Parameter                | Value                                                |
|----------|--------------------------|------------------------------------------------------|
| POWERLAW | $\Gamma$                 | $1.49 \pm 0.03$                                      |
|          | norm.                    | $(3.6 \pm 0.1) \times 10^{-4}$                       |
|          | $\chi^2/\text{d.o.f.}$   | $179 / 134 = 1.34$                                   |
| BKNPOWER | $\Gamma_1$               | $1.65 \pm 0.04$                                      |
|          | $E_{\text{break}}$ (keV) | $2.4 \pm 0.3$                                        |
|          | $\Gamma_2$               | $1.1 \pm 0.1$                                        |
|          | norm.                    | $(3.5 \pm 0.1) \times 10^{-4}$                       |
| COMPTT + | $\chi^2/\text{d.o.f.}$   | $151 / 132 = 1.15$                                   |
|          | $kT_e$ (keV)             | $0.7^{+0.2}_{-0.1}$                                  |
|          | $\tau$                   | $11^{+2}_{-1}$                                       |
| NTHCOMP  | norm.                    | $(1.5^{+0.5}_{-0.3}) \times 10^{-2}$                 |
|          | $\Gamma$                 | $1.2 \pm 0.1$                                        |
|          | $\chi^2/\text{d.o.f.}$   | $(1.5 \pm 0.4) \times 10^{-4}$<br>$151 / 131 = 1.16$ |

Note: Errors are quoted at the  $1\sigma$  level. All of the above models included a Galactic absorption component (PHABS) with  $N_{\text{H}} = 1.66 \times 10^{20} \text{ cm}^{-2}$ . The best-fitting (broken power-law) model is plotted in Fig. 4.

### 3.1.4 Ly $\alpha$ contamination of photometry

The strong Ly $\alpha$  ( $\lambda_{\text{rest}} = 1216 \text{ \AA}$ ) line emission from the source appears at  $2390 \text{ \AA}$  in the observed frame; it therefore contaminates the Swift UVOT UUVW1, XMM–Newton OM UVM2, and GALEX NUV photometry. Precisely correcting for this contamination in this case is difficult since we have no measurement of the Ly $\alpha$  EW and, as noted by Elvis et al. (2012), there is no (or weak) correlation between it and the EWs of either the Balmer lines or Mg II. However, if we assume a typical Ly $\alpha$  EW of  $60 \text{ \AA}$  (in the rest frame), we can determine from the equations of Elvis et al. (2012) (their section 4.1.3) that Ly $\alpha$  contributes approximately 20 per cent of the photometric flux.

### 3.1.5 Fermi

The Fermi  $\gamma$ -ray source 3FGL J1222.4+0414 is associated with PKS J1222+0413. In the Fermi LAT 4-yr source catalogue (3FGL; Acero et al. 2015) the  $\gamma$ -ray source detection significance, derived from the test statistic (TS), is  $30.01\sigma$ . In the updated Fermi-LAT 8-yr Source List (FL8Y) description of the  $\gamma$ -ray sky with respect to 3FGL, the source significance improved slightly ( $30.77\sigma$ ), and the spectral shape is described as a soft power law with an index of  $\Gamma = 2.87 \pm 0.04$ , in the 100 MeV to 30 GeV energy range.

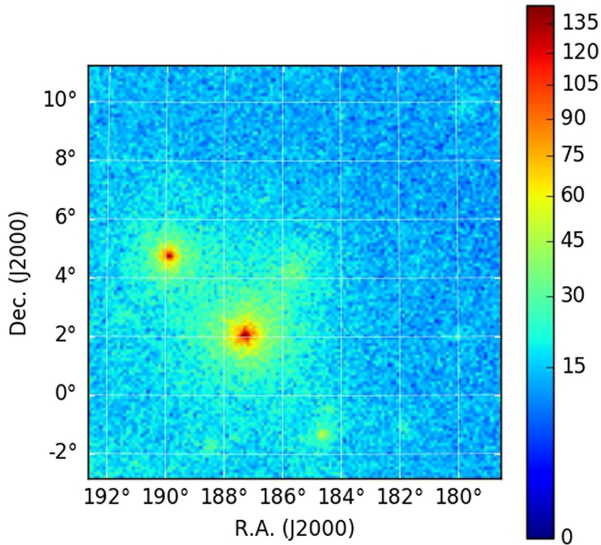

**Figure 5.** *Fermi* count map for the period beginning at the mission start and ending 2017 July 31. PKS J1222+0413 is at RA 185.59°, Dec. 4.22°. The brightest source in the field, 3C 273, is at RA 187.28°, Dec. 2.05°, and PKS 1237+049 (3FGL J1239.5+0443) is at RA 189.89°, Dec. 4.72°.

To construct a contemporaneous SED of PKS J1222+0413, we extracted  $\gamma$ -ray data from the period 2017 March 20 to July 11 (to include our VLT X-shooter and *NuSTAR* observations) and from the period 2011 March–April [covering the *HST* Cosmic Origins Spectrograph (COS) UV spectrum of March 22 and SDSS optical spectrum of March 26]. Photons in a circular region of interest (RoI) of radius  $10^\circ$ , centred on the position of PKS J1222+0413, were considered. A zenith-angle cut of  $90^\circ$  was applied. The analysis was done using the *Fermi* Science Tools software package version v10r0p5, in combination with the PASS 8 instrument response functions (event class 128 and event type 3) corresponding to the P8R2\_SOURCE.V6 response and the gll\_iem.v06.fits and iso\_P8R2\_SOURCE.V6.v06 models for the Galactic and isotropic diffuse background, respectively. The spectral model of the region included all sources located within the RoI with spectral shapes and initial parameters as in the 3FGL catalogue (Acero et al. 2015).

The extraction of the *Fermi*-LAT data is complicated by the presence of two bright, nearby  $\gamma$ -ray sources in the RoI (see Fig. 5). The prototypical quasar 3C 273 has an angular separation  $\approx 2.7^\circ$  from PKS J1222+0413, comparable to the *Fermi* PSF at 1 GeV. Another quasar, PKS 1237+049, is  $\approx 4.3^\circ$  from PKS J1222+0413. The *Fermi* PSF is larger at lower energies: the 95 per cent containment radius at 100 MeV is  $\geq 10^\circ$ .

In the earlier time period (2011), PKS J1222+0413 is detected with a TS of 29.02 ( $\approx 5.4\sigma$ ), the photon index being  $\Gamma = 2.72 \pm 0.25$ . The *Fermi*-LAT flux points at two bins/decade and the model spectrum up to the highest energy photon from the source in that period are shown in Fig. 6, although we obtain a flux detection in one low-energy bin only. Note that  $\gamma$ -ray flux upper limits at the 95 per cent confidence level are computed for bins were TS < 9. In the 2017 time window, PKS J1222+0413 is detected with a TS of 56.68 ( $\approx 7.5\sigma$ ), with a photon index of  $\Gamma = 2.74 \pm 0.18$ . The last significant energy bin is 1–3.16 GeV. We thus did not attempt any study of the variability, and note that in the *Fermi* All-Sky Variability Analysis flare map of the region (generated in 2019 January using all available data from the mission start)

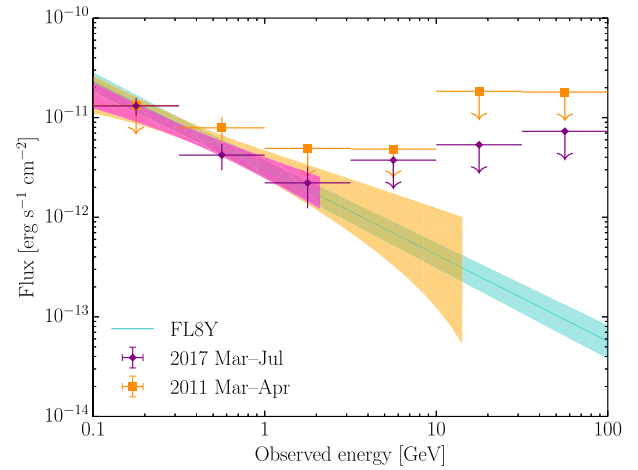

**Figure 6.** *Fermi*  $\gamma$ -ray spectra of PKS J1222+0413. The spectrum extracted from the period 2017 March 20 to July 11 is shown in fuchsia; the corresponding model is shown as the short (0.1–2 GeV) bow-tie. The spectrum extracted from the period 2011 March 1 to April 30 is shown in orange; the corresponding model is shown as the medium-length (0.1–14 GeV) bow-tie. For comparison, the model spectrum taken from the *Fermi*-LAT 8-yr Source List (FLSY) is shown as the long, turquoise bow-tie.

that all of the flare activity is associated with other sources in the field (particularly 3C 273) and there are no recorded flare events in the vicinity of PKS J1222+0413. The spectral index found in both periods is fully compatible with the entire data set (FLSY) within statistical errors (see Fig. 6).

### 3.2 Radio monitoring data

#### 3.2.1 Effelsberg

Observations were conducted with the 100 m Effelsberg telescope in Germany, with the secondary focus receivers at 2.64, 4.85, 8.35, 10.45, 14.6, 23.05, and 32 GHz. For the multiple-feed systems at 4.85, 10.45, and 32 GHz the measurements were conducted differentially thus removing most of the linear tropospheric effects. To correct for potential pointing offsets we have adopted the cross-scan technique; that is, register the telescope response while slewing its main beam over the expected source position. With our set-up a complete radio SED needs roughly 40–45 min. It is therefore reasonable to assume that our observations are free of variability. Each pointing has been subjected to a pipeline of post-measurement corrections accounting for power losses caused by: (a) potential pointing offsets, (b) atmospheric absorption, and (c) deformations of the main telescope reflector. The fractional effect of each of these operations is given in table 3 of Angelakis et al. (2019). The observed dataset has been finally calibrated with reference to standard sources listed in table 3 of Angelakis et al. (2015). Table 3 in this paper summarizes the flux densities at all observing frequencies weighted averaged over a period roughly from 2011 May 19 to 2012 February 18. The uncertainty in the average flux densities is limited to less than a couple of per cent.

**Table 3.** Radio monitoring data from Effelsberg.

| Freq.<br>(GHz) | $\langle S \rangle$<br>(mJy) | $\sigma_S$<br>(mJy) | $N$ | Start      | Rate<br>(d) |
|----------------|------------------------------|---------------------|-----|------------|-------------|
| 2.64           | 663                          | 3                   | 9   | 2011-06-06 | 32.0        |
| 4.85           | 779                          | 3                   | 9   | 2011-05-19 | 34.3        |
| 8.35           | 923                          | 5                   | 10  | 2011-05-19 | 30.5        |
| 10.45          | 950                          | 6                   | 10  | 2011-05-19 | 30.5        |
| 14.60          | 920                          | 10                  | 10  | 2011-05-19 | 30.5        |
| 23.05          | 880                          | 20                  | 7   | 2011-05-19 | 45.7        |
| 32.00          | 830                          | 20                  | 6   | 2011-05-19 | 54.9        |

Note: The error-weighted mean radio flux densities and their  $1\sigma$  errors, the number of detections  $N$  in the observation period starting on the given date and ending on 2012-02-18.

### 3.3 Additional archival data

#### 3.3.1 FIRST

The Jansky Very Large Array Faint Images of the Radio Sky at Twenty centimetres (FIRST; Helfand, White & Becker 2015) project surveyed  $10\,575\text{ deg}^2$  of the sky at 1.4 GHz between 1993 and 2011. Querying the source catalogue, we find a radio source 0.5 arcsec from the optical coordinates of PKS J1222+0413, which is the only radio source within a search radius of 30 arcsec. The integrated flux density was reported to be 800.63 mJy and we adopt an error of 5 per cent, representative of the systematic uncertainty for bright sources (White et al. 1997). The catalogue fluxes are measured in coadded images from multiple observations; the mean observation date is given as 2001 March 14 with an RMS of  $\approx 4$  d.

#### 3.3.2 Planck

ESA’s *Planck* space observatory (Tauber et al. 2010) operated from 2009 July, mapping the sky from high-frequency radio to far-infrared wavelengths. Its High-Frequency Instrument depleted its supply of liquid helium coolant in 2012 January, after which only the Low-Frequency Instrument (recording the 30, 44, and 70 GHz bands) was operable until the science mission ended in 2013 October.

We perform a cone search using the default radius equal to the beam FWHM at each frequency (see Planck Collaboration XXVI 2016). In Table 4 we give the fluxes derived from the quoted catalogue flux densities which were calculated using the Gaussian fitting method. The source is not detected at 545 or 857 GHz either in the PCCS2 catalogue or in the lower-reliability PCCS2E catalogue.

#### 3.3.3 Herschel

The *Herschel Space Observatory* (Pilbratt et al. 2010) operated contemporaneously with *Planck*, from 2009 July to 2013 April. *Herschel* carried three science instruments: the Photodetecting Array Camera and Spectrometer (PACS, covering 55–220  $\mu\text{m}$ ), the Spectral and Photometric Imaging Receiver (SPIRE, containing a low-resolution spectrometer covering 194–672  $\mu\text{m}$  and a photometer with three bands centred on 250, 350, and 500  $\mu\text{m}$ ) and the Heterodyne Instrument for the Far Infrared (covering 157–210 and 236–615  $\mu\text{m}$ ). We searched the PACS and SPIRE point source catalogues (PSCs; Marton et al. 2016; Marton et al. 2017) and obtained the data listed in Table 4.

#### 3.3.4 Spitzer

PKS J1222+0413 has been observed by the *Spitzer Space Telescope* (Werner et al. 2004). The source was detected by the 24  $\mu\text{m}$  array of the Multiband Imaging Photometer for *Spitzer* (MIPS) during an observation made on 2005 January 28. The source flux density is taken from the Spitzer Enhanced Imaging Products<sup>4</sup> (SEIP) source list.

#### 3.3.5 WISE

The *Wide-field Infrared Survey Explorer* (WISE; Wright et al. 2010) originally made photometric observations in four bands: W1 (3.4  $\mu\text{m}$ ), W2 (4.6  $\mu\text{m}$ ), W3 (12  $\mu\text{m}$ ), and W4 (22  $\mu\text{m}$ ). For each band we have calculated the flux from the instrumental profile-fit photometry magnitude listed in the AllWISE catalogue.<sup>5</sup> The magnitudes recorded for the bands were W1:  $12.802 \pm 0.023$ ; W2:  $11.634 \pm 0.023$ ; W3:  $8.901 \pm 0.034$ , and W4:  $6.513 \pm 0.080$ ; the photometric quality of each band was reported to be of the highest quality.

The *WISE* telescope was placed into hibernation in 2011 February, following the depletion of its coolant. It was reactivated in 2013 September to continue the *NEOWISE* mission (Mainzer et al. 2014) using only the two shortest wavelength filters. Infrared photometry spanning several years is available for these filters, which sample the hot dust in our source. In Fig. 7 we show the infrared light curves. Several exposures were taken on each pass of the telescope (with a cadence of roughly 6 months), which we have binned into the 10 single-epoch measurements shown. For each epoch we have calculated the mean magnitude and its standard error from the individual exposures, after applying a  $3\sigma$  clipping algorithm to remove anomalous data. The peak-to-peak magnitude change (from the first *WISE* observation in mid-2010 to the latest *NEOWISE* observation in mid-2017) is  $\approx 1.2$  mag, and  $\approx 0.6$  mag changes are seen in the *NEOWISE* period.

#### 3.3.6 2MASS

PKS J1222+0413 was detected as part of the Two Micron All Sky Survey (2MASS; Skrutskie et al. 2006), conducted between 1997 and 2001. The  $J$ ,  $H$ , and  $K_s$  profile-fit instrumental magnitudes recorded in the 2MASS All-Sky Point Source Catalog were  $16.348 \pm 0.133$ ,  $15.849 \pm 0.146$ , and  $14.969 \pm 0.140$ , respectively.

#### 3.3.7 Sloan

Two optical spectra of the source have been recorded as part of the Sloan Digital Sky Survey (SDSS). The first was taken on 2008 February 12 with the original SDSS spectrograph; the second was taken on 26 March 2011 with the Baryon Oscillation Spectroscopic Survey (BOSS) spectrograph, allowing a greater wavelength coverage. The two spectra are compared with our recent X-shooter spectrum in Fig. 1. It can be seen that the 2011 spectrum is redder than that of 2008. Margala et al. (2016) noted that in the spectra of BOSS quasars, the flux densities were overestimated by  $\sim 19$  per cent at 3300  $\text{\AA}$  and underestimated it by  $\sim 24$  per cent at 1  $\mu\text{m}$ . Given the  $\sim 1$  arcsec seeing at 500 nm during our X-shooter

<sup>4</sup><http://irsa.ipac.caltech.edu/data/SPITZER/Enhanced/SEIP/>

<sup>5</sup><http://irsa.ipac.caltech.edu/>



**Table 4.** The multiwavelength data set.

| Q | Band          | Instrument<br>(Survey) | Observation date<br>(D/M/Y or M/Y) | $\log(\nu_{\text{obs}})$<br>(Hz) | Flux<br>( $10^{-14}$ erg s $^{-1}$ cm $^{-2}$ ) | Luminosity<br>( $10^{43}$ erg s $^{-1}$ ) | Ref. |
|---|---------------|------------------------|------------------------------------|----------------------------------|-------------------------------------------------|-------------------------------------------|------|
|   | Radio         | (FIRST)                | 03/01                              | 9.15                             | $1.12 \pm 0.06$                                 | $5.4 \pm 0.3$                             | [1]  |
|   | Radio         | Effelsberg             | 06/11–02/12                        | 9.42                             | $1.750 \pm 0.0008$                              | $8.40 \pm 0.04$                           | [7]  |
|   | Radio         | Effelsberg             | 05/11–02/12                        | 9.69                             | $3.80 \pm 0.01$                                 | $18.3 \pm 0.07$                           | [7]  |
|   | Radio         | Effelsberg             | 05/11–02/12                        | 9.92                             | $7.71 \pm 0.04$                                 | $37.0 \pm 0.2$                            | [7]  |
|   | Radio         | Effelsberg             | 05/11–02/12                        | 10.02                            | $9.93 \pm 0.06$                                 | $47.7 \pm 0.3$                            | [7]  |
|   | Radio         | Effelsberg             | 05/11–02/12                        | 10.16                            | $13.4 \pm 0.2$                                  | $64.5 \pm 0.7$                            | [7]  |
|   | Radio         | Effelsberg             | 05/11–02/12                        | 10.36                            | $20.3 \pm 0.5$                                  | $97 \pm 2$                                | [7]  |
|   | Radio         | <i>Planck</i>          | 08/09–08/13                        | 10.48                            | $25 \pm 2$                                      | $119 \pm 9$                               | [2]  |
|   | Radio         | Effelsberg             | 05/11–02/12                        | 10.51                            | $26.6 \pm 0.6$                                  | $128 \pm 3$                               | [7]  |
|   | Radio         | <i>Planck</i>          | 08/09–08/13                        | 10.64                            | $33 \pm 2$                                      | $158 \pm 11$                              | [2]  |
|   | Radio         | <i>Planck</i>          | 08/09–01/12                        | 10.85                            | $55 \pm 3$                                      | $266 \pm 16$                              | [2]  |
|   | Radio         | <i>Planck</i>          | 08/09–01/12                        | 11.00                            | $89 \pm 14$                                     | $429 \pm 66$                              | [2]  |
|   | Radio         | <i>Planck</i>          | 08/09–01/12                        | 11.16                            | $116 \pm 22$                                    | $560 \pm 100$                             | [2]  |
|   | Radio         | <i>Planck</i>          | 08/09–01/12                        | 11.34                            | $144 \pm 31$                                    | $690 \pm 150$                             | [2]  |
|   | Radio         | <i>Planck</i>          | 08/09–01/12                        | 11.55                            | $165 \pm 70$                                    | $790 \pm 340$                             | [2]  |
|   | Far-IR        | <i>Herschel</i>        | 03/07/10                           | 11.78                            | $233 \pm 13$                                    | $1117 \pm 60$                             | [3]  |
|   | Far-IR        | <i>Herschel</i>        | 03/07/10                           | 11.93                            | $276 \pm 14$                                    | $1322 \pm 67$                             | [3]  |
|   | Far-IR        | <i>Herschel</i>        | 03/07/10                           | 12.08                            | $292 \pm 17$                                    | $1399 \pm 81$                             | [3]  |
|   | Far-IR        | <i>Herschel</i>        | 03/07/10                           | 12.27                            | $356 \pm 41$                                    | $1706 \pm 200$                            | [3]  |
|   | Far-IR        | <i>Herschel</i>        | 03/07/10                           | 12.48                            | $285 \pm 21$                                    | $1369 \pm 100$                            | [3]  |
|   | Far-IR        | <i>Spitzer</i> MIPS    | 28/01/05                           | 13.11                            | $142 \pm 1$                                     | $679 \pm 6$                               | [4]  |
|   | Mid-IR        | <i>WISE</i>            | 18–22/06/10                        | 13.13                            | $283 \pm 21$                                    | $1358 \pm 100$                            | [5]  |
|   | Mid-IR        | <i>WISE</i>            | 18–22/06/10                        | 13.41                            | $226 \pm 7$                                     | $1085 \pm 34$                             | [5]  |
|   | Mid-IR        | <i>WISE</i>            | 06/10–12/10                        | 13.81                            | $248 \pm 5$                                     | $1191 \pm 25$                             | [5]  |
|   | Mid-IR        | <i>WISE</i>            | 06/10–12/10                        | 13.95                            | $210 \pm 4$                                     | $1005 \pm 21$                             | [5]  |
|   | Near-IR       | (2MASS)                | 25/02/00                           | 14.14                            | $95 \pm 12$                                     | $457 \pm 59$                              | [6]  |
|   | Near-IR       | (2MASS)                | 25/02/00                           | 14.26                            | $84 \pm 11$                                     | $405 \pm 55$                              | [6]  |
| ✓ | Near-IR       | VLT X-shooter          | 03/04/17                           | 14.27                            | $57.3 \pm 0.5$                                  | $275 \pm 2$                               | [7]  |
|   | Near-IR       | (2MASS)                | 25/02/00                           | 14.39                            | $112 \pm 14$                                    | $536 \pm 65$                              | [6]  |
| ✓ | Optical       | VLT X-shooter          | 03/04/17                           | 14.48                            | $74.2 \pm 1.1$                                  | $363 \pm 5$                               | [7]  |
|   | Optical       | (SDSS)                 | 12/02/08                           | 14.48                            | $124 \pm 8$                                     | $621 \pm 40$                              | [8]  |
| † | Optical       | (SDSS)                 | 26/03/11                           | 14.48                            | $122 \pm 2$                                     | $596 \pm 10$                              | [9]  |
| † | UV            | (SDSS)                 | 26/03/11                           | 14.71                            | $140 \pm 7$                                     | $699 \pm 35$                              | [9]  |
| ✓ | UV            | VLT X-shooter          | 03/04/17                           | 14.71                            | $91.2 \pm 0.6$                                  | $513 \pm 3$                               | [7]  |
| ✓ | UV            | <i>Swift</i> UVOT      | 27/06/17                           | 15.06                            | $211 \pm 8$                                     | $1011 \pm 37$                             | [7]  |
|   | UV            | <i>XMM-Newton</i> OM   | 12/07/06                           | 15.13                            | $228 \pm 4$                                     | $1094 \pm 19$                             | [7]  |
|   | UV            | <i>GALEX</i>           | 31/03/04                           | 15.12                            | $250 \pm 8$                                     | $1199 \pm 38$                             | [10] |
| † | UV            | <i>HST</i> COS         | 22/03/11                           | 15.21                            | $220 \pm 20$                                    | $1240 \pm 90$                             | [7]  |
| † | UV            | <i>HST</i> COS         | 22/03/11                           | 15.27                            | $180 \pm 20$                                    | $1000 \pm 100$                            | [7]  |
|   | UV            | <i>GALEX</i>           | 31/03/04                           | 15.29                            | $135 \pm 16$                                    | $649 \pm 77$                              | [10] |
| † | UV            | <i>HST</i> COS         | 22/03/11                           | 15.35                            | $30 \pm 3$                                      | $1040 \pm 20$                             | [7]  |
|   | X-ray         | <i>ROSAT</i>           | 24/12/92                           | 17.35                            | $100 \pm 9$                                     | $500 \pm 40$                              | [7]  |
| ✓ | X-ray         | <i>Swift</i> XRT       | 27/06/17                           | 17.37                            | $46 \pm 12$                                     | $230 \pm 60$                              | [7]  |
|   | X-ray         | <i>XMM-Newton</i> EPIC | 12/07/06                           | 18.08                            | $150 \pm 8$                                     | $720 \pm 40$                              | [7]  |
| ✓ | X-ray         | <i>NuSTAR</i>          | 27/06/17                           | 18.86                            | $220 \pm 10$                                    | $1060 \pm 50$                             | [7]  |
|   | X-ray         | <i>Swift</i> BAT       | 12/04–09/10                        | 19.18                            | $1450 \pm 200$                                  | $6960 \pm 960$                            | [11] |
| ✓ | $\gamma$ -ray | <i>Fermi</i> LAT       | 03/17–06/17                        | 22.63                            | $1300 \pm 270$                                  | $6300 \pm 1300$                           | [7]  |
| ✓ | $\gamma$ -ray | <i>Fermi</i> LAT       | 03/17–06/17                        | 23.13                            | $420 \pm 120$                                   | $2020 \pm 600$                            | [7]  |
| ✓ | $\gamma$ -ray | <i>Fermi</i> LAT       | 03/17–06/17                        | 23.63                            | $220 \pm 100$                                   | $1100 \pm 470$                            | [7]  |
| ✓ | $\gamma$ -ray | <i>Fermi</i> LAT       | 03/17–06/17                        | 24.13                            | $<370$                                          | $<1800$                                   | [7]  |
| ✓ | $\gamma$ -ray | <i>Fermi</i> LAT       | 03/17–06/17                        | 24.63                            | $<530$                                          | $<2600$                                   | [7]  |
| ✓ | $\gamma$ -ray | <i>Fermi</i> LAT       | 03/17–06/17                        | 25.13                            | $<730$                                          | $<3500$                                   | [7]  |

Note: References: [1] FIRST catalogue, Helfand et al. (2015); [2] *Planck* Second Point Source Catalog, Planck Collaboration XXVI (2016); [3] *Herschel* point source catalogues, Marton et al. (2016); [4] *Spitzer* SEIP Source List, Werner et al. (2004); [5] *WISE* AllWISE Source Catalog, Wright et al. (2010); [6] Two Micron All-Sky Survey, Skrutskie et al. (2006); [7] this work; [8] Sloan Digital Sky Survey DR7, Abazajian et al. (2009); [9] Sloan Digital Sky Survey DR9, Ahn et al. (2012); [10] *GALEX* Data Release GR6, Martin et al. (2005); [11] *Swift* BAT 105-month all-sky hard X-Ray survey, Oh et al. (2018). The ‘Q’ flag indicates our quasi-simultaneous data (✓ for data used in our SED fitting of Section 4.1.1 and † for optical/UV data used in Section 3.3.9).

observation, slit losses are likely minimal in the optical and UV, for which we used 1.2 and 1.3 arcsec width slits, respectively.

In the observed frame, the flux density at 4000 Å (7000 Å) is approximately 30 (25) per cent greater in the 2008 SDDS spectrum

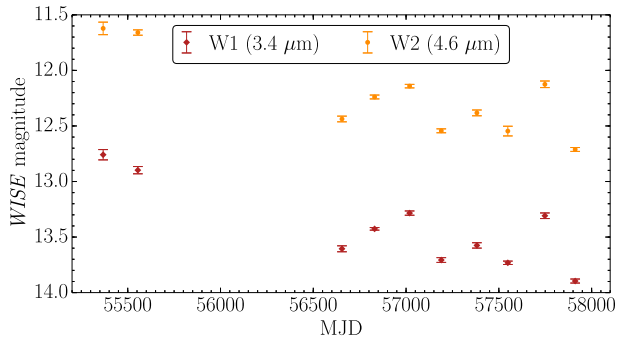

**Figure 7.** The *WISE* and *NEOWISE* infrared light curve of PKS J1222+0413, showing observations made between 2010 June and 2017 June.

than in the 2017 X-shooter spectrum, and the flux densities of the two SDSS spectra are similar at 4000 Å.

### 3.3.8 GALEX

The *Galaxy Evolution Explorer* (*GALEX*; Martin et al. 2005), an ultraviolet space telescope, detected the source in both its near-ultraviolet (NUV) and far-ultraviolet (FUV) bands. The FUV flux is severely absorbed because the filter (1340–1806 Å) covers a spectral region blueward of the Lyman break of a Lyman limit system (LLS) at 1793 Å (observed).

### 3.3.9 Hubble Space Telescope

Wotta et al. (2016) studied absorbing systems on sightlines towards 61 AGN, including PKS J1222+0413. As part of this study they obtained a short (900 s) exposure of the UV spectrum of the source using the G140L (900–2150 Å) filter of the *HST* Cosmic Origins Spectrograph (COS). This snapshot spectrum was recorded on 2011 March 22. They identified an LLS with  $\log(N_{\text{H}}) = 17.55 \pm 0.10 \text{ cm}^{-2}$  at redshift  $z_{\text{LLS}} = 0.6547$ . The  $N_{\text{H}}$  was determined by assessing the suppression of continuum flux density relative to the composite quasar template of Telfer et al. (2002),<sup>6</sup> scaled to match the unabsorbed region of the spectrum. We correct the observed spectrum for the Lyman continuum absorption by multiplying the fluxes by a factor  $e^{\tau_{\lambda}}$  where the optical depth

$$\tau_{\lambda} = \sigma_0 \left( \frac{\lambda}{\lambda_{\text{LLS}}} \right)^3 N_{\text{H}} \text{ for } \lambda \leq \lambda_{\text{LLS}}, \quad (1)$$

the absorption cross-section at the Lyman limit  $\sigma_0 = 6.3 \times 10^{-18} \text{ cm}^2$  and  $\lambda_{\text{LLS}} = (1 + z_{\text{LLS}}) \times 912 \text{ Å}$  (Paresce 1984; Shull et al. 2017). The observed and corrected spectra are shown in Fig. 8.

To estimate the AGN continuum, we select several regions free from narrow absorption lines and calculate the mean flux density in each of these and then bin into three wider regions, shown in Fig. 8. It should be noted that the estimate of the column density of the LLS is dependent on the shape of the composite template used to approximate the intrinsic continuum. Without an independent measure of the column density, our ‘recovery’ of the PKS J1222+0413 AGN continuum is therefore also dependent

<sup>6</sup>The template shown in Fig. 8 is the composite of the radio loud subset of sources. It is constructed from 205 spectra of 107 objects, all with  $z > 0.33$  and with  $\langle z \rangle = 1.00$ .

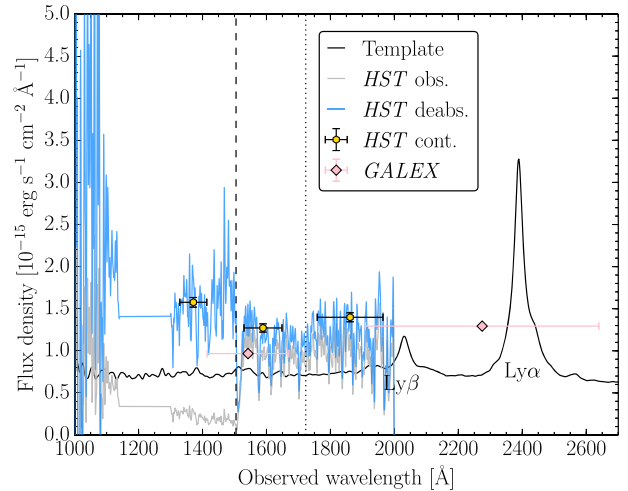

**Figure 8.** The *HST* COS spectrum of PKS J1222+0413. The observed spectrum is shown in grey. Overplotted in blue is the spectrum corrected for Galactic reddening and the Lyman continuum absorption of an LLS at  $z_{\text{LLS}} = 0.65$ . The dashed vertical line indicates the Lyman break of the LLS; the dotted vertical line indicates the Lyman break of an intervening partial LLS at  $z_{\text{pLLS}} = 0.89$ . *GALEX* NUV and FUV photometry (corrected for Galactic reddening) are shown as pink diamonds. For reference, the composite spectrum of Telfer et al. (2002) is shown in black. This template has been scaled to approximately match the continuum flux level of the 2011 SDSS spectrum.

on the shape of the template, so the flux density determined at 1370 Å should be treated with some caution. The continuum flux density at 1590 Å is perhaps slightly underestimated because of the intervening partial LLS at  $z_{\text{pLLS}} = 0.89$ , the column density of which is undetermined. The continuum flux density at 1860 Å is more reliable although all three estimates are hampered by the limited signal-to-noise of the spectrum. The spectrum blueward of  $\approx 1100 \text{ Å}$  is too noisy to be of use.

### 3.3.10 ROSAT

An 8 ks pointed observation of PKS J1222+0413 was made by the *Röntgensatellit* (*ROSAT*; Voges et al. 1999) on 1992 December 24. The archival data were reduced using *HEASOFT* XSELECT v2.4d. The source extraction region was chosen to be a 120 arcsec radius circle centred on the source. The background region was a 360 arcsec radius circle offset on a blank patch of sky, on the same chip as the source. The 0.1–2.0 keV source count rate was  $\approx 0.15 \text{ counts s}^{-1}$ . The source spectrum was rebinned using the *GRPPHA* tool to contain a minimum of 20 counts per bin.

The best-fitting model was a simple power law with  $\Gamma = 1.72 \pm 0.04$  and normalization  $(5.2 \pm 0.2) \times 10^{-4}$ , giving  $\chi^2_{\nu} = 90/57 = 1.58$ . The best-fitting  $N_{\text{H}} = (7 \pm 2) \times 10^{-3}$ , lower than the Dickey & Lockman (1990) value but improving the fit by only  $\Delta\chi^2 = 9$  for one additional free parameter.

### 3.3.11 Swift BAT

In the broad-band SED we also include data from the *Swift* BAT 105-month all-sky hard X-Ray survey (Oh et al. 2018) spanning the period 2004 December to 2013 August. The time-averaged spectrum and response file were obtained from the online archive. The spectrum was well fitted in *XSPEC* with a single power-law

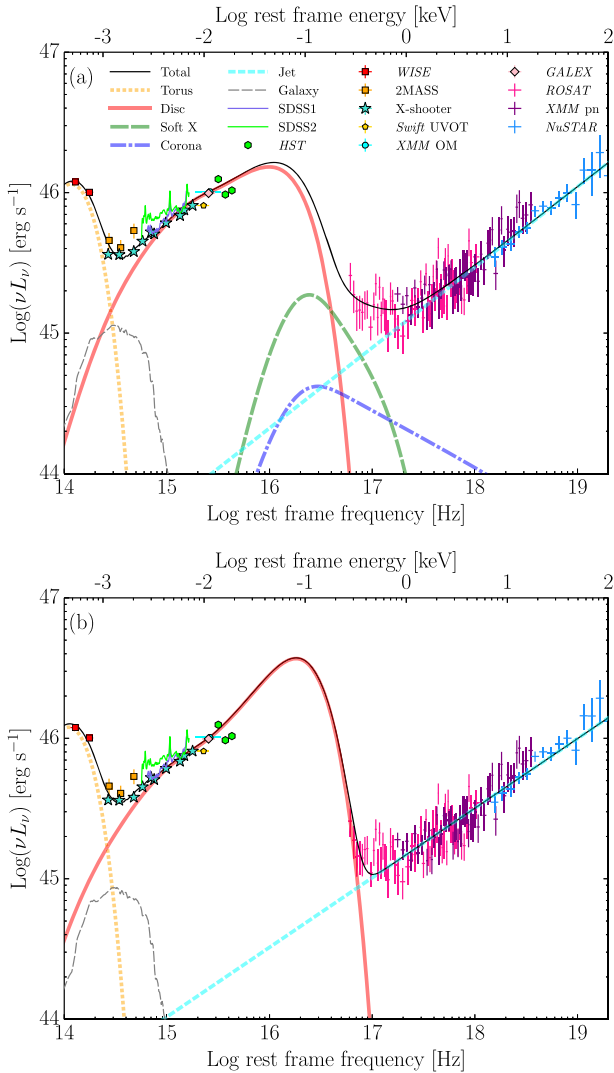

**Figure 9.** Accretion flow models applied to the NIR to X-ray SED, for different BH spins: (a)  $a_* = 0$ ; (b)  $a_* = 0.8$ .

of index  $\Gamma = 1.5 \pm 0.1$  and normalization  $(9_{-3}^{+5}) \times 10^{-4}$ , giving  $\chi^2_{\nu} = 0.32$ .

## 4 THE ORIGIN OF THE $\gamma$ -RAY EMISSION

### 4.1 Determining the external photon field

Here, we determine the parameters of the ambient photon field with which the jet interacts to produce the observed high-energy emission. In the following we use our multiwavelength data to determine the size scales and luminosities of the accretion disc and its corona, the broad emission line region and the hot dusty torus. These are applied in our jet model which is described in Section 4.2.

#### 4.1.1 The accretion flow

To model the infrared-to-X-ray SED we have scaled up the X-shooter fluxes by a factor 1.3 to match the level of the SDSS spectra in the UV (see Section 3.3.7 and Fig. 9). The *Swift* UVOT, *XMM* OM, and *GALEX* NUV photometry have been scaled by a factor 0.8 to account for Ly  $\alpha$  contamination (see Section 3.1.4). The *XMM*

pn and *ROSAT* X-ray spectra have been scaled by factors 0.8 and 0.5, respectively, to match the flux level of our joint *NuSTAR–Swift* XRT observation. Note that the 2011 SDSS spectrum and *HST* COS spectrum (shown in lime green in Fig. 9) were recorded 3 d apart.

We employ the energy-conserving accretion flow model, OPTXCONV, of Done et al. (2013) and perform a simple test to determine whether the spin of the BH can be constrained by our data. In the OPTXCONV model, a colour–temperature corrected accretion disc spectrum is produced from the accretion disc outer radius (which we set to the self-gravity radius) down to  $R_{\text{cor}}$ , inside of which the accretion power is divided between warm and hot Comptonization regions which are the origin of the observed soft X-ray excess and coronal power-law emission, respectively. As the BH spin increases, the innermost stable circular orbit moves closer to the BH and (for fixed  $R_{\text{cor}}$ ) this increases the emission from the Comptonization regions. In this test we fix several parameters to those typical of a NLS1; namely, the warm Comptonization region electron temperature  $kT_e = 0.2$  keV and optical depth  $\tau = 15$ , the photon index of the power-law tail  $\Gamma_{\text{PL}} = 2.4$  and the ratio of power-law to soft excess power  $f_{\text{PL}} = 0.3$ . The outer accretion disc radius is fixed at  $1000 R_g$ .

As well as the accretion flow, we model the hot dust emission as simple blackbody, a scaled host galaxy template<sup>7</sup> and add a power-law with  $\Gamma = 1.4$  to model the putative jet emission at hard X-ray energies. The hot dust temperature and luminosity is well determined by the *WISE* W1 and W2 points. The hot dust temperature is well-determined from the *WISE* W1 and W2 points and changes little between fits. As can be seen in Fig. 9, our data do not strongly discriminate between zero- and high-spin models. However, the high-spin model slightly overpredicts the soft X-ray flux (although the modelled *ROSAT* spectrum has been scaled down by 20 per cent to match the flux level of the *Swift* XRT data) and cannot accommodate soft Comptonization or coronal components. We note that this model conserves energy between the outer and inner accretion flow, producing the optical and UV/X-ray emission, respectively. The UV/X-ray flux would be lower if power were lost between outer and inner radii as the result of an accretion disc wind which could be present if the accretion rate were super-Eddington as in the high-spin model. We cannot therefore rule out a high BH spin. Overall, the zero-spin model is a better representation of the data and the parameters of the accretion flow components are then typical of an NLS1.

#### 4.1.2 The broad-line region luminosity and radius

The BLR is thought to be a system of gas clouds distributed on sub-parsec scales, very close to the central BH. The clouds are photoionized by the intense radiation from the accretion flow and the resulting line emission (and reflection) from the clouds can be Compton-scattered to higher energies by interaction with the particles in the relativistic jet.

Following the method described in Kynoch et al. (2018), we estimate the luminosity and radius of the BLR, from which the energy density of BLR photons can be calculated. Our X-shooter spectrum covers four of the prominent broad emission lines, (C III], Mg II, H  $\beta$ , and H  $\alpha$ ) from which we can estimate the BLR luminosity. The luminosities of the H  $\alpha$  and H  $\beta$  broad components are listed in Table 1 and for the Mg II line and C III] broad

<sup>7</sup>We use the 5 Gyr-old elliptical galaxy template of Polletta et al. (2007), scaled so that the total model fits the data at  $\approx 1 \mu\text{m}$ .

components we get a luminosity of  $\log L_{\text{MgII}} = 43.30 \text{ erg s}^{-1}$  and  $\log L_{\text{CIII}} = 43.42 \text{ erg s}^{-1}$ , respectively. This results in a total BLR luminosity of  $\log L_{\text{BLR}} = 44.54 \text{ erg s}^{-1}$ . As noted in Section 2.2, we estimate the BLR radius to be  $260_{-67}^{+91}$  light-days ( $\approx 2.28 \times 10^4 R_g$  for our adopted BH mass) from the H  $\beta$  radius–luminosity relationship of Bentz et al. (2013).

#### 4.1.3 The dusty torus luminosity and radius

Photons from the extended ( $\sim$ parsec-scale) dusty torus are also upscattered by interaction with the jet. We parametrize this source of seed photons by the torus luminosity and radius (the latter is dependent on the dust temperature). The hot dust luminosity and temperature are determined from the blackbody fit to the mid-IR photometry: the values are listed in Table 5. Then, for a silicate dust composition, we estimate the hot dust radius to be  $\sim 4000$  light-days ( $\approx 3.51 \times 10^5 R_g$ ). We note that the torus hot dust radius may be smaller than this depending on the assumption of grain size.

## 4.2 The broad-band SED

We use the Gardner & Done (2018) single-zone, leptonic jet code JET (based on the physics of Ghisellini & Tavecchio 2009), adapted so that the external photon field can be set via input parameters.<sup>8</sup> We first test the standard jet scalings against our data. For a BH of mass  $M_{\text{BH}} = 2 \times 10^8 M_{\odot}$  with  $L/L_{\text{Edd}} = \dot{m} = 0.93$ , the scalings of Gardner & Done (2018) predict a magnetic field strength of  $B \propto \sqrt{\dot{m}/M_{\text{BH}}} = 17.7 \text{ G}$  and power injected into relativistic electrons  $P_{\text{rel}} \propto \dot{m} M_{\text{BH}} = 3.72 \times 10^{43} \text{ erg s}^{-1}$ . Lengths scale linearly with mass, so in mass-normalized units the size of the jet emission region is equal to that of a typical Ghisellini et al. (2010) FSRQ, i.e.  $Z_{\text{diss}} = 1280 R_g$ . For the jet geometry, we assume an opening angle  $\phi = 0.1$  rad and inclination to the line of sight equal to the inverse of the bulk Lorentz factor  $i = 1/\Gamma_{\text{BLF}}$ . We keep all other jet parameters equal to the mean FSRQ parameters of Ghisellini et al. (2010), listed under the ‘Scaled’ model in Table 6, the resultant model is shown in Fig. 10.

We find that the SED is not as discrepant as when performing the same test with 1H0323+342 (see the top panels of Fig. 10). The jet power  $P_j$  (relative to disc power) in this scaled model is comparable to other blazars but clearly the model needs some adjustment to fit the data.

We adjust the parameters of the scaled model to better fit the broad-band SED. The Compton dominance (the ratio of peak Compton to synchrotron peak luminosities) of the scaled model is clearly too low; this can be increased by lowering  $B$ . The magnetic field is lowered approximately by a factor five in our fitted model compared to the scaled one. This is necessary in part to avoid the SSC peak overpredicting the low-energy X-ray data. Increasing  $P_{\text{rel}}$  and  $\Gamma_{\text{BLF}}$  has the effect of increasing the jet SED in luminosity. A solution near equipartition (equal energy densities in electrons and the magnetic field) is found by adjusting  $B$ ,  $P_{\text{rel}}$ , and  $\Gamma_{\text{BLF}}$ . By increasing  $\Gamma_{\text{BLF}}$ , we can lower  $P_{\text{rel}}$  to reach approximate equipartition, having lowered  $B$ . Then, the shapes of the synchrotron and EC peaks are adjusted by tuning the parameters of the injected electron distribution (i.e. the low- and high-energy slopes  $s_1$  and  $s_2$  and the break Lorentz factor  $\gamma_{\text{brk}}$ ). It is necessary to lower  $\gamma_{\text{brk}}$

slightly to match the frequency peak of the synchrotron emission. The jet power in this fitted model is approximately half that of  $L_{\text{AD}}$ .

It can be seen in Fig. 10 that this fitted EC-disc model fits our broad-band SED well. In particular we are able to achieve good agreement with our optical/UV data from X-shooter and *Swift* UVOT, soft X-ray data from *NuSTAR*, and the *Fermi*  $\gamma$ -ray spectrum, all of which were obtained within the  $\sim 3$ -month period 2017 March–June. However, this model does not fit the high-energy *NuSTAR* spectrum as well, although it is likely that the spectral shape above  $\approx 20 \text{ keV}$  is not very well defined by the *NuSTAR* data. The harder jet X-ray spectrum in our model does match the *Swift* BAT spectrum taken from the 105-month monitoring campaign. The model also slightly overpredicts the mid-infrared data. This may be because we have not accounted for any synchrotron jet emission in the infrared in our modelling in Section 4.1.1. The mid-infrared variability seen in the *WISE* light curve (Fig. 7) would suggest that the jet does make some contribution in this waveband. Any overestimation we may have made of the hot dust luminosity will have minimal impact on the models we have presented. This is because the jet emission region is closer to the accretion disc and BLR than the torus, therefore the energy density of infrared torus seed photons is relatively low.

## 5 DISCUSSION

### 5.1 PKS J1222+0413 as an NLS1

In Section 2.2 we found that the FWHM of the H  $\alpha$  and H  $\beta$  Balmer lines and the individual lines of the Mg II doublet are each lower than  $2000 \text{ km s}^{-1}$ , the limiting line width that is usually used to separate NLS1s from broad-line Seyferts (see Table 1). If, however, we use Gaussian rather than Lorentzian profiles to model the Mg II lines, we determine FWHMs of  $2240 \text{ km s}^{-1}$ . Yao et al. (2015) found a similar FWHM =  $2264 \text{ km s}^{-1}$  for H  $\beta$  when modelling its broad component with a Gaussian. Torrealba et al. (2012) modelled the total Mg II profile with two Gaussians (one broad and one narrow) centred at  $2800 \text{ \AA}$ . For the broad component they determined an FWHM =  $5268 \text{ km s}^{-1}$ . Clearly, the determination of the emission line FWHMs (hence the classification of this source as either a narrow- or broad-line Seyfert 1) depends on the assumed line shape and the contribution of the narrow-line component to the total line flux. Here, we have measured the Balmer line widths directly from their observed profiles, without assuming a particular line shape. In doing so, we have assumed that the flux contribution of the narrow-line region is negligible, based on our estimation from a typical ratio of [O III]  $\lambda 5007$  to narrow H  $\beta$  luminosities. If the narrow Balmer lines are somewhat stronger than we have estimated (which is possible, given the range of values of  $L_{\text{[OIII]}}/L_{\text{H}\beta}^{\text{n}}$  determined from large AGN samples<sup>9</sup>) then the FWHMs of the broad Balmer would correspondingly increase to slightly above  $2000 \text{ km s}^{-1}$ . Alternative measures of the emission line FWHMs of this source may give values exceeding  $2000 \text{ km s}^{-1}$ , in which case PKS J1222+0413 is not strictly an NLS1. However, we point out that the  $2000 \text{ km s}^{-1}$  limit is arbitrary and other authors have used more relaxed definitions of NLS1s (e.g. Zhou et al. 2006; Rakshit et al. 2017; Lakićević, Popović & Kovačević-Dojčinović 2018).

<sup>8</sup>A concise description of the model was given in Kynoch et al. (2018); further details can be found in Gardner & Done (2018) and Ghisellini & Tavecchio 2009.

<sup>9</sup>Note that Zhou et al. (2006) found that only  $\sim 15$  per cent of NLS1s had a ratio  $\lesssim 5$ , and in most of the sources with low ratios a large fraction of the emission was from H II regions of the host galaxies. It is therefore very unlikely that  $L_{\text{H}\beta}^{\text{n}}$  is much greater than we have estimated.

**Table 5.** Results from spectral fits to the deabsorbed IR to hard X-ray SED.

| $a_*$   | $L/L_{\text{Edd}}$ | $\dot{M}$<br>( $M_{\odot}$ yr) | $R_{\text{cor}}$<br>( $R_g$ ) | $\log(L_{\text{AD}})$<br>( $\text{erg s}^{-1}$ ) | $\log(L_{\text{SX}})$<br>( $\text{erg s}^{-1}$ ) | $\log(L_{\text{PL}})$<br>( $\text{erg s}^{-1}$ ) | $T_{\text{tor}}$<br>(K) | $\log(L_{\text{tor}})$<br>( $\text{erg s}^{-1}$ ) | $R_{\text{tor}}$<br>(ld) | $\log(L_{\text{AGN}})$<br>( $\text{erg s}^{-1}$ ) | $\chi^2/\text{dof}$ |
|---------|--------------------|--------------------------------|-------------------------------|--------------------------------------------------|--------------------------------------------------|--------------------------------------------------|-------------------------|---------------------------------------------------|--------------------------|---------------------------------------------------|---------------------|
| (1)     | (2)                | (3)                            | (4)                           | (5)                                              | (6)                                              | (7)                                              | (8)                     | (9)                                               | (10)                     | (11)                                              | (12)                |
| (a) 0.0 | 0.93               | 7.3                            | 11.7                          | 46.64                                            | 45.53                                            | 45.17                                            | 1430                    | 46.19                                             | 4000                     | 46.68                                             | 172/126             |
| b) 0.8  | 2.16               | 7.8                            | 2.90                          | 46.91                                            | 00.00                                            | 00.00                                            | 1350                    | 46.21                                             | 4000                     | 46.91                                             | 198/127             |

*Note:* The columns are: (1) dimensionless BH spin: this was fixed at this value; (2) Eddington ratio; (3) mass accretion rate; (4) outer coronal radius in gravitational radii,  $R_g = 2.95 \times 10^{11} \text{ m} = 1.14 \times 10^{-2}$  light-days; (5) luminosity of the accretion disc; (6) luminosity the soft Comptonization region ‘SX’; (7) luminosity of the power-law tail ‘PL’; (8) temperature of the dusty torus; (9) luminosity of the IR radiation from the torus; (10) the dusty torus inner radius in light-days; (11) the total AGN luminosity AD+SX+PL; (12) the  $\chi^2$  statistic over the number of degrees of freedom (dof) in the model.  $\dot{M}$  and  $R_{\text{tor}}$  are not model parameters but have been derived from our results.

**Table 6.** Jet parameters obtained from spectral fits to the full multiwavelength SED with BBODY + OPTXCONV + JET models.

| Parameter                                            | Units                   | Model value                                  |           |                                              |            |
|------------------------------------------------------|-------------------------|----------------------------------------------|-----------|----------------------------------------------|------------|
|                                                      |                         | PKS J1222+0413                               |           | 1H 0323+342                                  |            |
|                                                      |                         | Scaled with<br>$M_{\text{BH}}$ and $\dot{m}$ | EC-disc   | Scaled with<br>$M_{\text{BH}}$ and $\dot{m}$ | EC-disc    |
| <b>Input parameters:</b>                             |                         |                                              |           |                                              |            |
| $Z_{\text{diss}}$                                    | [ $R_g$ ] (ld)          | 1280 (15)                                    | 1280 (15) | 1280 (1.5)                                   | 1280 (1.5) |
| $a_*$                                                |                         | 0.0                                          | 0.0       | 0.0                                          | 0.0        |
| $i$                                                  | (deg)                   | 4.41                                         | 2.86      | 4.41                                         | 4.77       |
| $\Gamma_{\text{BLF}}$                                |                         | 13                                           | 20        | 13                                           | 12         |
| $\delta$                                             |                         | 13                                           | 20        | 13                                           | 12         |
| $B$                                                  | (G)                     | 17.7                                         | 3.75      | 38                                           | 8          |
| $\log(P_{\text{rel}})$                               | ( $\text{erg s}^{-1}$ ) | 43.6                                         | 42.9      | 42.24                                        | 41.0       |
| $\gamma_{\text{min}}$                                |                         | 1.00                                         | 1.00      | 1.00                                         | 1.00       |
| $\gamma_{\text{brk}}$                                |                         | 300                                          | 200       | 300                                          | 300        |
| $\gamma_{\text{max}}$                                |                         | 3000                                         | 3000      | 3000                                         | 3000       |
| $s_1$                                                |                         | 1.0                                          | -1.0      | 1.0                                          | 1.5        |
| $s_2$                                                |                         | 2.7                                          | 3.2       | 2.7                                          | 2.7        |
| <b>Output / derived parameters:</b>                  |                         |                                              |           |                                              |            |
| $\gamma_{\text{cool}}$                               |                         | 12                                           | 23        | 19                                           | 47         |
| $\log(\nu_{\text{ssa}})$                             | (Hz)                    | 11.5                                         | 11.5      | 11.6                                         | 10.6       |
| $\log\left(\nu_{\text{peak}}^{\text{sync}}\right)$   | (Hz)                    | 13.5                                         | 12.9      | 13.8                                         | 12.5       |
| $\log\left(\nu L_{\text{peak}}^{\text{sync}}\right)$ | ( $\text{erg s}^{-1}$ ) | 47.1                                         | 46.2      | 45.56                                        | 43.12      |
| $\log(P_{\text{rad}})$                               | ( $\text{erg s}^{-1}$ ) | 45.32                                        | 44.94     | 43.95                                        | 42.51      |
| $\log(P_e)$                                          | ( $\text{erg s}^{-1}$ ) | 45.01                                        | 44.69     | 43.76                                        | 42.74      |
| $\log(P_B)$                                          | ( $\text{erg s}^{-1}$ ) | 45.45                                        | 44.48     | 44.12                                        | 42.70      |
| $\log(P_p)$                                          | ( $\text{erg s}^{-1}$ ) | 47.28                                        | 46.31     | 45.91                                        | 45.01      |
| $\log(P_j)$                                          | ( $\text{erg s}^{-1}$ ) | 47.30                                        | 46.35     | 45.93                                        | 45.01      |
| $P_j/L_{\text{AD}}$                                  |                         | 4.4                                          | 0.51      | 4.3                                          | 0.52       |
| $U_e/U_B$                                            |                         | 0.37                                         | 1.6       | 0.44                                         | 1.1        |

*Note:* Comparison of jet models for PKS J1222+0413 and the best-fitting model for 1H 0323+342 determined by Kynoch et al. (2018).  $P_{\text{rad}}$ ,  $P_e$ ,  $P_B$ ,  $P_p$ , and  $P_j$  are the radiative, electron, magnetic field, kinetic, and total jet powers, respectively.  $U_e/U_B$  is the ratio of relativistic electron to magnetic field energy densities. The corresponding models are shown in Fig. 10.

Czerny et al. (2018) emphasize that the  $2000 \text{ km s}^{-1}$  division is a *phenomenological* one. The NLS1 definition of Osterbrock & Pogge (1985) was determined from low-mass objects in the local Universe. It has been proposed that NLS1s are objects that lie at the extreme of ‘Eigenvector 1’ (Boroson & Green 1992), with the sequence driven primarily by the accretion rate. A high accretion rate may be a better indicator of the high-mass, high- $z$  analogues of local NLS1s than the emission line FWHMs given that linewidths will be greater for higher mass sources. Czerny et al. (2018) calculate that the dividing FWHM between narrow- and broad-line AGN is a factor  $\approx 2$  greater in objects of a mass  $3 \times 10^8 M_{\odot}$  than those of  $10^7 M_{\odot}$ . Therefore for PKS J1222+0413, based on the BH mass the above scaling would

imply an FWHM  $\lesssim 4000 \text{ km s}^{-1}$ . Additionally, the strong Fe II and weak [O III] emission seen in the optical spectra are typical of NLS1s. We therefore confirm that PKS J1222+0413 is an NLS1, although one with a much greater than average mass.

The apparent weakness of the NLR is consistent with the view of this object as a high-luminosity, highly accreting quasar. Netzer et al. (2004) suggested that the NLRs of high-luminosity AGN may be different to those of lower luminosity, nearby sources. The NLR of high-luminosity sources may be lost as a result of being dynamically unbound. Collinson et al. (2017) found an anticorrelation between [O III]  $\lambda 5007$  line strength and Eddington ratio in their sample of high-redshift AGN. Several of their highest

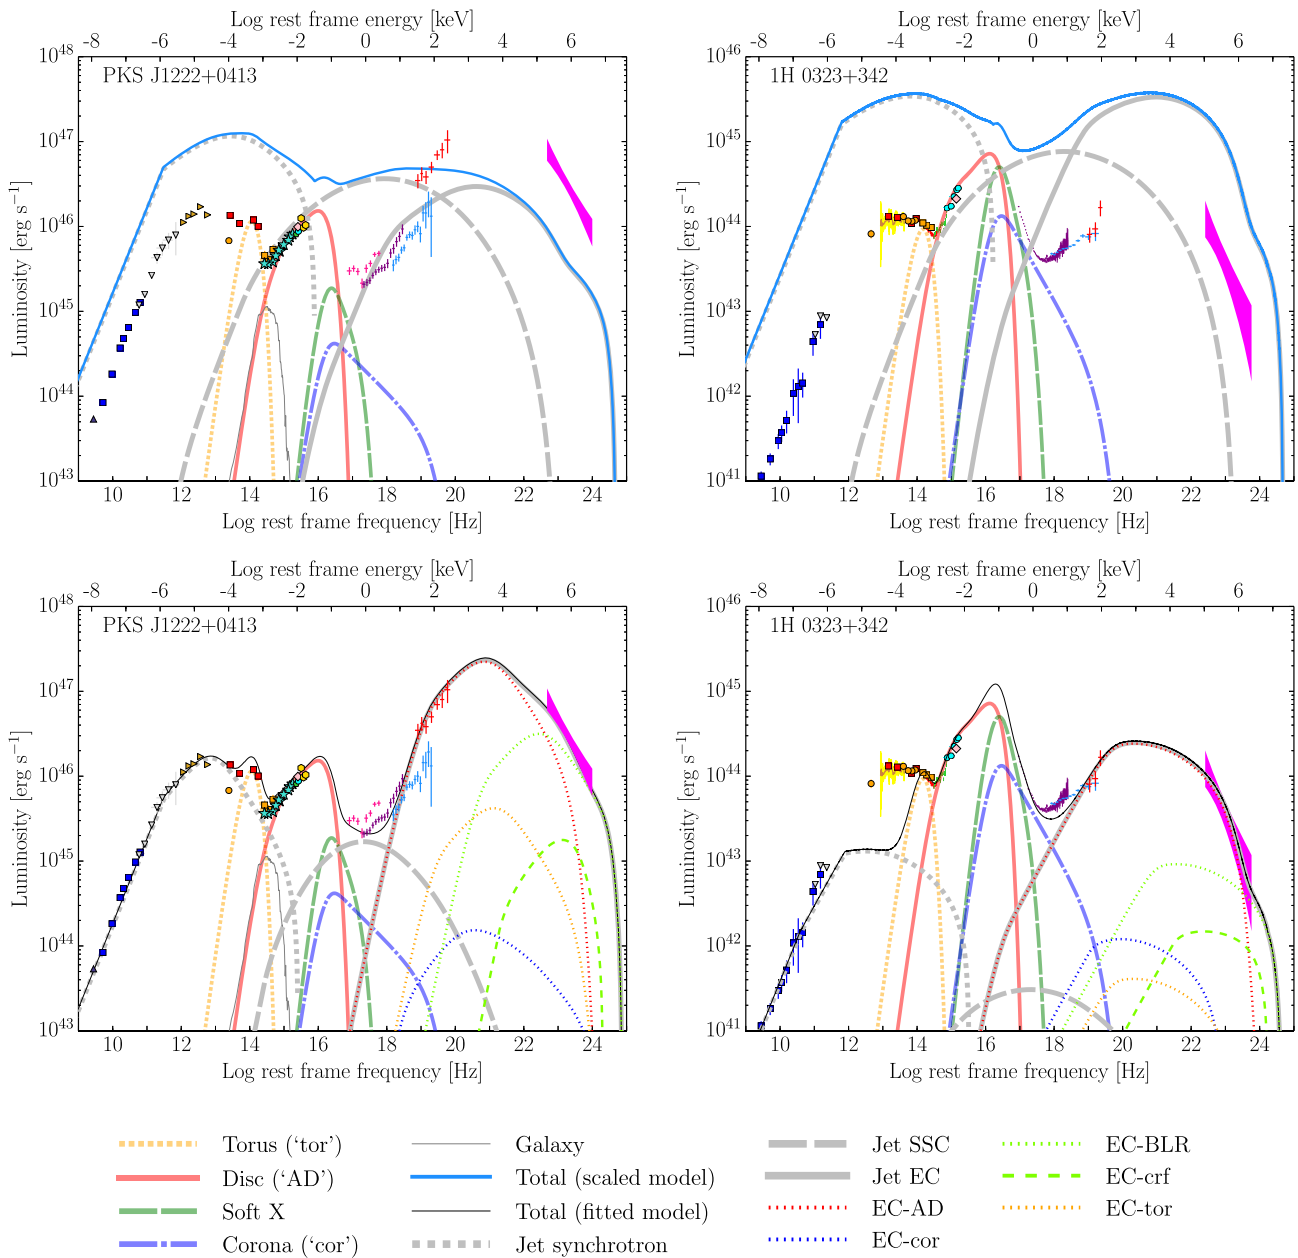

**Figure 10.** *Top:* BH mass and accretion rate scaled models of the jet emission from PKS J1222+0413 (left) and 1H 0323+342 (right). *Bottom:* Fitted EC-disc models for PKS J1222+0413 (left) and 1H 0323+342 (right). We show the three components of the jet emission (synchrotron, synchrotron self-Compton ‘SSC’, and external Compton ‘EC’) as grey lines. The individual EC components (from the disc, corona, BLR, reflection of the corona off the BLR ‘crf’, and torus) are shown as coloured dotted and dashed lines. The PKS J1222+0413 data are coded the same as Fig. 3. The 1H 0323+342 models were presented by Kynoch et al. (2018).

accretion rate sources had very weak [O III] emission, similar to what we see in PKS J1222+0413. Based on their study of the super-Eddington NLS1 RX J0439.6–5311, Jin et al. (2017) present a picture of high accretion rate AGN which explains the weakness of the NLR as the result of it being (partly) shielded from the nuclear ionizing flux by a ‘puffed up’ inner accretion disc or by a disc wind. Given the Eddington ratio determined for this source, it is unlikely that PKS J1222+0413 has a super-Eddington wind like RX J0439.6–5311. However, its SED peaks in the FUV and the accretion flow X-ray spectrum is very soft and would therefore not overionize material driven out in a UV line-driven wind. It may be

that PKS J1222+0413 has a UV line-driven wind partly shielding the NLR. Although the narrow emission lines are weak, we find that the high-ionization lines (emitted by gas between the BLR and NLR) are strong, e.g. Neon ([Ne IV]  $\lambda$ 2423) and the iron transitions (Fe XI).

## 5.2 The jet of PKS J1222+0413

It was challenging to extract the  $\gamma$ -ray spectrum of PKS J1222+0413 (Section 3.1.5). Because of the close proximity of

the bright  $\gamma$ -ray sources 3C 273 and PKS 1237+049 we found that very few photons in the field had a strong statistical association with PKS J1222+0413; most were more favourably associated with the other sources. Applying an 85 percent confidence cut, we are left with very few photons and a limited  $\gamma$ -ray spectrum. As we noted earlier, there have been no  $\gamma$ -ray flares recorded by *Fermi* near the location of PKS J1222+0413. Rapid variability in the optical has not been recorded either, with Ojha, Krishna & Chand (2019) noting that the intra-night optical variability was remarkably low, and consistent with levels seen in non-jetted (radio-quiet) sources. However, the *WISE* data (Fig. 7) show variability which is likely from jet synchrotron emission.

Whereas the viewing angle to the jet (and hence the bulk Lorentz and Doppler factors, under the assumption  $i = 1/\Gamma_{\text{BLF}} \approx \delta$ ) was constrained by radio measurements (Fuhrmann et al. 2016) in the case of 1H 0323+342 (Kynoch et al. 2018), we have no such observational constraint for the jet of PKS J1222+0413. Lister et al. (2016)<sup>10</sup> investigated the radio jet of PKS J1222+0413 as part of the MOJAVE project and found that the jet is two-sided on kpc scales (but it is one-sided on pc scales). Lister (2018) notes that no measurable motion within the jet has been recorded in a 14-yr monitoring period and that the maximum apparent jet speed is sub-luminal:  $(0.9 \pm 0.3)c$ . If the transverse speed of the jet  $v_t = 0.9c$ , this would imply a large viewing angle to the jet axis with  $i \approx 50\text{--}90^\circ$  and a low bulk Lorentz factor whereas high Lorentz factors are determined by SED modelling (e.g. Yao et al. 2015). The viewing angle is likely to be small because of the one-sided pc-scale jet structure. Its long-term (2008 to date) 15 GHz radio light-curve, recorded by the Owens Valley Radio Observatory (OVRO, Richards et al. 2011), shows variability which is also suggestive of a high Doppler factor and low viewing angle. It is likely that the apparent sub-luminal motion is due to a lack of traceable bright knots, rather than a low-speed jet.

Whilst it is difficult to extract a reliable  $\gamma$ -ray spectrum for PKS J1222+0413 because of its low  $\gamma$ -ray flux and the presence of bright nearby sources, we are confident of the  $\gamma$ -ray nature of our source. Other, well-defined properties such as the radio and infrared variability and high-resolution radio images of the jet are supportive of the presence of very high energy processes. Furthermore, the X-ray data from *NuSTAR* and *Swift* BAT are evidence of a high-energy Compton component, and the  $\gamma$ -ray spectrum appears to be consistent with the very high-energy tail of this feature.

### 5.3 Comparison with 1H 0323+342

We presented a very similar analysis of the lowest redshift  $\gamma$ -NLS1, 1H 0323+342, in Kynoch et al. (2018). Here we make a comparison with our findings from PKS J1222+0413. Obviously, PKS J1222+0413 has a much greater BH mass than 1H 0323+342. We therefore expect PKS J1222+0413 to be more similar to a standard (high-mass) blazar. Indeed, when we scale a standard FSRQ jet by mass and mass accretion rate we see that discrepancy between the predicted SED and the data is much less than Kynoch et al. (2018) found for 1H 0323+342. The high accretion rate of PKS J1222+0413 means that a high magnetic field is predicted from the scaling relations. As with 1H 0323+342, the resultant predicted SED has a low Compton dominance and a shape much more akin to a BL Lac, albeit at a much higher luminosity than BL Lacs. We can better fit the data by turning down the magnetic field

strength. (With 1H 0323+342 it was necessary to turn down both the magnetic field strength and the power injected into the relativistic electrons.) As with 1H 0323+342, a typical NLS1 SED model fits the observed NIR–X-ray SED well, if a (jet) power law is added to account for hard X-rays. In 1H 0323+342 Kynoch et al. (2018) found that the X-ray photon index below  $\approx 2$  keV was very soft, typical of (non-jetted) NLS1s, whereas above 2 keV, the photon index was much harder, typical of non-thermal jet emission. This was interpreted as a transition from accretion-flow-dominated to jet-dominated emission. We do not find such strong evidence of a soft, low-energy photon index in PKS J1222+0413 (Sections 3.1.3 and 4.1.1), likely because its higher mass and redshift mean that the accretion flow makes less of a contribution to the flux in the *XMM–Newton* bandpass.

Kynoch et al. (2018) showed that 1H 0323+342 had a low jet power for its accretion power, compared to the *Fermi* blazars studied by Ghisellini et al. (2014). Here, we find that the jet of PKS J1222+0413 is similarly underpowered relative to its accretion power. However, since it has a BH mass similar to FSRQs, in terms of its *absolute* jet power it occupies the same region of the blazar sequence as the FSRQs, as one might expect. Foschini (2017) proposed that there are two branches on the blazar sequence. This can be seen if the jet power (calculated from the radio luminosity) is plotted against the disc luminosity. The track of the main branch, containing FSRQs and BL Lacs (which have similar BH masses), may be explained as a difference in the environment in which the relativistic electrons cool. The lower track, connecting radio-loud NLS1s to FSRQs (which have similar cooling environments), must be driven by the difference in the BH masses. A small number of sources have jet powers estimated both from their radio luminosity and from SED modelling. We find that the jet power calculated via SED modelling is generally greater than that estimated from the radio luminosity. Paliya et al. (2019) have modelled the broad-band SEDs of sixteen  $\gamma$ -NLS1s to determine the jet powers, and have compared these to a sample of previously modelled blazars. Their results suggest that  $\gamma$ -NLS1s form the low-jet-power tail of the FSRQ population, rather than forming a separate branch.

Yao et al. (2015) also modelled the SED of PKS J1222+0413 and presented both an EC-BLR and EC-torus case in which the  $\gamma$ -rays were predominantly upscattered seed photons from the BLR or torus, respectively. Here, we have demonstrated that an EC-disc model can also reproduce the observed SED. In our EC-disc model we determine a high bulk Lorentz factor  $\Gamma_{\text{BLF}} = 20$ , which is substantially greater than the mean value 13 Ghisellini et al. (2010) found for FSRQs and the value 12 Kynoch et al. (2018) found for 1H 0323+342. The factors determined by Yao et al. (2015) from their jet models were even higher:  $\Gamma_{\text{BLF}} = 26, 35$  for the EC-BLR and EC-torus models, respectively. Unfortunately, Yao et al. (2015) do not quote any jet powers determined from their models, or give sufficient details of their model parameters and so it is not possible to undertake a meaningful comparison. We emphasize that the jet power and parameters determined by SED fitting are still model-dependent. The results which are obtained will depend on the detailed assumptions made, and the approaches taken to compute the complex physical processes. Even within the same prescription, the complexity of jet models mean that it is difficult to converge on a unique solution. Our approach has been to construct a quasi-simultaneous data set and to self-consistently model and apply the ambient photon field which is crucial in reproducing the observed EC (X-ray and  $\gamma$ -ray) emission. In future studies it would be useful if the results were presented in a more uniform way, with equivalent model parameters and basic assumptions stated.

<sup>10</sup>In this paper our source is named 4C +04.42.

## 6 CONCLUSIONS

Our main results are summarized below:

- (i) The BH mass  $\approx 2 \times 10^8 M_{\odot}$  is very high for an NLS1, which typically have an order of magnitude smaller BH masses.
- (ii) We conclude that PKS J1222+0413 is an NLS1, based on our new data and analysis of its optical spectral properties and the accretion flow parameters obtained from modelling its broad-band SED. This is in agreement with the NLS1 classification made by Yao et al. (2015).
- (iii) The very weak [O III] is suggestive of a UV line-driven disc wind shielding the narrow-line region from ionizing UV flux produced near to the BH.
- (iv) The jet power is approximately half of the accretion disc luminosity whereas for BL Lac and FSRQ-type blazars, the jet power typically exceeds the accretion power (Ghisellini et al. 2014). This finding is similar to the result for the  $\gamma$ -NLS1 1H 0323+342 which Kynoch et al. (2018) also found to have an underpowered jet.
- (v) Because of its high BH mass, similar to FSRQ-type blazars, PKS J1222+0413 lies in the region of the blazar sequence occupied by the FSRQs. Most other  $\gamma$ -ray detected NLS1s, like 1H 0323+342, have much lower absolute jet powers (similar to BL Lacs) but share many of the same jet properties as FSRQs. PKS J1222+0413 is therefore an ideal object in which to explore the relationship between  $\gamma$ -NLS1s and FSRQs.

## ACKNOWLEDGEMENTS

DK acknowledges the receipt of a UK RI Science and Technology Facilities Council (STFC) studentship (ST/N50404X/1). DK, HL, MJW, and CD acknowledge support from the STFC (ST/P000541/1). MB acknowledges support from the Black Hole Initiative at Harvard University through the grant from the John Templeton Foundation. Thanks to Gerard Kriss for providing electronic versions of the Telfer et al. (2002) composite spectra. Thanks to Luigi Foschini and Matt Lister for useful discussions. In this paper we have made use of the following:

- (i) the ESO REFLEX data reduction software (Freudling et al. 2013);
- (ii) data from *Fermi*, a NASA mission operated and funded NASA, the U.S. Department of Energy and institutions in France, Germany, Japan, Italy, and Sweden;
- (iii) data from *Spitzer*, *WISE*, *Planck*, and 2MASS which are available from the NASA / IPAC Infrared Science Archive, which is operated by the Jet Propulsion Laboratory, California Institute of Technology, under contract with NASA;
- (iv) data from *NuSTAR*, a project led by the California Institute of Technology, managed by the Jet Propulsion Laboratory and funded by NASA;
- (v) data from *Swift*, and its XRT Data Analysis Software (XRTDAS) developed under the responsibility of the ASI Science Data Center (ASDC), Italy;
- (vi) data from and software developed for *XMM-Newton*, an ESA science mission with instruments and contributions directly funded by ESA Member States and NASA;
- (vii) data and software (including the FTOOLS<sup>11</sup> Blackburn 1995) provided by the High Energy Astrophysics Science Archive Research Center (HEASARC), which is a service of the Astrophysics

Science Division at NASA/GSFC and the High Energy Astrophysics Division of the Smithsonian Astrophysical Observatory;

(viii) data from SDSS: funding for the SDSS, SDSS-II and SDSS-III has been provided by the Alfred P. Sloan Foundation, the Participating Institutions, the National Science Foundation, the U.S. Department of Energy, NASA, the Japanese Monbukagakusho, the Max Planck Society, and the Higher Education Funding Council for England;

(ix) Ned Wright's cosmology calculator (Wright 2006);

(x) Doug Welch's excellent absorption law calculator (<http://www.dougwelch.org/Acurve.html>).

## REFERENCES

- Abazajian K. N. et al., 2009, *ApJS*, 182, 543  
 Abdo A. A. et al., 2009, *ApJ*, 707, L142  
 Acero F. et al., 2015, *ApJS*, 218, 23  
 Ahn C. P. et al., 2012, *ApJS*, 203, 21  
 Angelakis E. et al., 2015, *A&A*, 575, A55  
 Angelakis E. et al., 2019, preprint ([arXiv:1902.04404](https://arxiv.org/abs/1902.04404))  
 Arnaud K. A., 1996, in Jacoby G. H., Barnes J., eds, ASP Conf. Ser. Vol. 101, *Astronomical Data Analysis Software and Systems V*, Astron. Soc. Pac., San Francisco, p. 17  
 Bentz M. C. et al., 2013, *ApJ*, 767, 149  
 Blackburn J. K., 1995, in Shaw R. A., Payne H. E., Hayes J. J. E., eds, ASP Conference Series Vol. 77, *Astronomical Data Analysis Software and Systems IV*, Astron. Soc. Pac., San Francisco, p. 367  
 Blandford R. D., Znajek R. L., 1977, *MNRAS*, 179, 433  
 Boroson T. A., Green R. F., 1992, *ApJS*, 80, 109  
 Capellupo D. M., Netzer H., Lira P., Trakhtenbrot B., Mejía-Restrepo J., 2015, *MNRAS*, 446, 3427  
 Cohen R. D., 1983, *ApJ*, 273, 489  
 Collinson J. S., Ward M. J., Landt H., Done C., Elvis M., McDowell J. C., 2017, *MNRAS*, 465, 358  
 Cushing M. C., Vacca W. D., Rayner J. T., 2004, *PASP*, 116, 362  
 Czerny B., Panda S., Śniegowska M., Kozłowski S., Nikolajuk M., Du P., You B., 2018, in *Revisiting Narrow-line Seyfert 1 Galaxies and Their Place in the Universe*, Padova Botanical Garden, Italy, p. 30  
 Dickey J. M., Lockman F. J., 1990, *ARA&A*, 28, 215  
 Done C., Jin C., Middleton M., Ward M., 2013, *MNRAS*, 434, 1955  
 Elvis M. et al., 2012, *ApJ*, 759, 6  
 Foschini L., 2017, *Front. Astron. Space Sci.*, 4, 6  
 Fossati G., Maraschi L., Celotti A., Comastri A., Ghisellini G., 1998, *MNRAS*, 299, 433  
 Freudling W., Romaniello M., Bramich D. M., Ballester P., Forchi V., García-Dabó C. E., Moehler S., Neeser M. J., 2013, *A&A*, 559, A96  
 Fuhrmann L. et al., 2016, *Res. Astron. Astrophys.*, 16, 176  
 Gardner E., Done C., 2014, *MNRAS*, 438, 779  
 Gardner E., Done C., 2018, *MNRAS*, 473, 2639  
 Ghisellini G., Tavecchio F., 2009, *MNRAS*, 397, 985  
 Ghisellini G., Tavecchio F., Foschini L., Ghirlanda G., Maraschi L., Celotti A., 2010, *MNRAS*, 402, 497  
 Ghisellini G., Tavecchio F., Maraschi L., Celotti A., Sbarrato T., 2014, *Nature*, 515, 376  
 Ghisellini G., Righi C., Costamante L., Tavecchio F., 2017, *MNRAS*, 469, 255  
 Giommi P. et al., 2012, *A&A*, 541, A160  
 Greene J. E. et al., 2010, *ApJ*, 723, 409  
 Harrison F. A. et al., 2013, *ApJ*, 770, 103  
 Helfand D. J., White R. L., Becker R. H., 2015, *ApJ*, 801, 26  
 Jin C., Done C., Ward M., Gardner E., 2017, *MNRAS*, 471, 706  
 Kalberla P. M. W., Burton W. B., Hartmann D., Arnal E. M., Bajaja E., Morras R., Pöppel W. G. L., 2005, *A&A*, 440, 775  
 Kynoch D. et al., 2018, *MNRAS*, 475, 404  
 Lakićević M., Popović L. Č., Kovačević-Dojčinović J., 2018, *MNRAS*, 478, 4068

<sup>11</sup><http://heasarc.gsfc.nasa.gov/ftools/>



- Landt H. et al., 2017, *MNRAS*, 464, 2565
- Larsson J., D'Ammando F., Falocco S., Giroletti M., Orienti M., Piconcelli E., Righini S., 2018, *MNRAS*, 476, 43
- Lister M., 2018, in *Revisiting Narrow-line Seyfert 1 Galaxies and Their Place in the Universe*. Padova Botanical Garden, Italy, p. 22
- Lister M. L. et al., 2016, *AJ*, 152, 12
- Mainzer A. et al., 2014, *ApJ*, 792, 30
- Margala D., Kirkby D., Dawson K., Bailey S., Blanton M., Schneider D. P., 2016, *ApJ*, 831, 157
- Martin D. C. et al., 2005, *ApJ*, 619, L1
- Marton G. et al., 2016, in *Jablonka P., André P., van der Tak F., eds, Proc. IAU Symp. 315, From Interstellar Clouds to Star-Forming Galaxies: Universal Processes?* p. E53
- Marton G. et al., 2017, preprint ([arXiv:1705.05693](https://arxiv.org/abs/1705.05693))
- Mejía-Restrepo J. E., Trakhtenbrot B., Lira P., Netzer H., Capellupo D. M., 2016, *MNRAS*, 460, 187
- Netzer H., Shemmer O., Maiolino R., Oliva E., Croom S., Corbett E., di Fabrizio L., 2004, *ApJ*, 614, 558
- Oh K. et al., 2018, *ApJS*, 235, 4
- Ojha V., Krishna G., Chand H., 2019, *MNRAS*, 483, 3036
- Onken C. A., Ferrarese L., Merritt D., Peterson B. M., Pogge R. W., Vestergaard M., Wandel A., 2004, *ApJ*, 615, 645
- Osterbrock D. E., Pogge R. W., 1985, *ApJ*, 297, 166
- Paliya V. S., Parker M. L., Jiang J., Fabian A. C., Brenneman L., Ajello M., Hartmann D., 2019, *ApJ*, 872, 169
- Paresce F., 1984, in *Kondo Y., Bruhweiler F. C., Savage B. D., eds, NASA Conference Publication Vol. 2345*
- Pilbratt G. L. et al., 2010, *A&A*, 518, L1
- Planck Collaboration XXVI, 2016, *A&A*, 594, A26
- Polletta M. et al., 2007, *ApJ*, 663, 81
- Rakshit S., Stalin C. S., Chand H., Zhang X.-G., 2017, *ApJS*, 229, 39
- Richards J. L. et al., 2011, *ApJS*, 194, 29
- Shull J. M., Danforth C. W., Tilton E. M., Moloney J., Stevans M. L., 2017, *ApJ*, 849, 106
- Sikora M., Begelman M. C., 2013, *ApJ*, 764, L24
- Skrutskie M. F. et al., 2006, *AJ*, 131, 1163
- Tauber J. A. et al., 2010, *A&A*, 520, A1
- Telfer R. C., Zheng W., Kriss G. A., Davidsen A. F., 2002, *ApJ*, 565, 773
- Titarchuk L., 1994, *ApJ*, 434, 570
- Torrealba J., Chavushyan V., Cruz-González I., Arshakian T. G., Bertone E., Rosa-González D., 2012, *Rev. Mex. Astron. Astrofis.*, 48, 9
- Vacca W. D., Cushing M. C., Rayner J. T., 2003, *PASP*, 115, 389
- Vernet J. et al., 2011, *A&A*, 536, A105
- Véron-Cetty M.-P., Véron P., Gonçalves A. C., 2001, *A&A*, 372, 730
- Voges W. et al., 1999, *A&A*, 349, 389
- Werner M. W. et al., 2004, *ApJS*, 154, 1
- White R. L., Becker R. H., Helfand D. J., Gregg M. D., 1997, *ApJ*, 475, 479
- Wilms J., Allen A., McCray R., 2000, *ApJ*, 542, 914
- Wotta C. B., Lehner N., Howk J. C., O'Meara J. M., Prochaska J. X., 2016, *ApJ*, 831, 95
- Wright E. L., 2006, *PASP*, 118, 1711
- Wright E. L. et al., 2010, *AJ*, 140, 1868
- Yao S., Yuan W., Zhou H., Komossa S., Zhang J., Qiao E., Liu B., 2015, *MNRAS*, 454, L16
- Zhou H., Wang T., Yuan W., Lu H., Dong X., Wang J., Lu Y., 2006, *ApJS*, 166, 128
- Życki P. T., Done C., Smith D. A., 1999, *MNRAS*, 309, 561

This paper has been typeset from a  $\text{\TeX}/\text{\LaTeX}$  file prepared by the author.
